# Supplementary material for: Molecular understanding of ion specificity at the peptide bond
Source: Royal Society of Chemistry journal article supplement (doi:10.1039/c4cp04055d), 2014-11-07
Supplement: c4cp04055d1.pdf [file c4cp04055d1.pdf]

## **Molecular understanding of ion specificity at the peptide bond**

Chuanyu Yan and Tiancheng Mu\*

*Department of Chemistry, Renmin University of China, Beijing 100872, P. R. China.*

Correspondence should be addressed to,

*E-mail: tcmu@chem.ruc.edu.cn; Fax: +86-10-62516444; Tel: +86-10-62514925*

## Supplementary Information

| Figure number       | Descriptions                                                                                                       | page    |
|---------------------|--------------------------------------------------------------------------------------------------------------------|---------|
| <b>Fig. S1-S23</b>  | Original NMR data of anionic effects                                                                               | S3-S25  |
| <b>Fig. S24-S29</b> | Original NMR data of additional NMR experiments with external reference                                            | S26-S31 |
| <b>Fig. S30</b>     | NMR data of anionic effects                                                                                        | S32     |
| <b>Fig. S31-S36</b> | Original NMR data of cationic effects                                                                              | S33-S38 |
| <b>Fig. S37-S41</b> | Calculating setup and data                                                                                         | S39-S45 |
| <b>Table S1</b>     | Calculating setup and data                                                                                         | S43     |
| <b>Fig. S42</b>     | Deriving the slope <sub>B</sub> that is the rate of changing chemical shifts under effects of ions, from Fig. 2&4. | S46     |
| <b>Table S2.</b>    | The values of slope <sub>B</sub> derived from Fig. 2&4.                                                            | S47     |

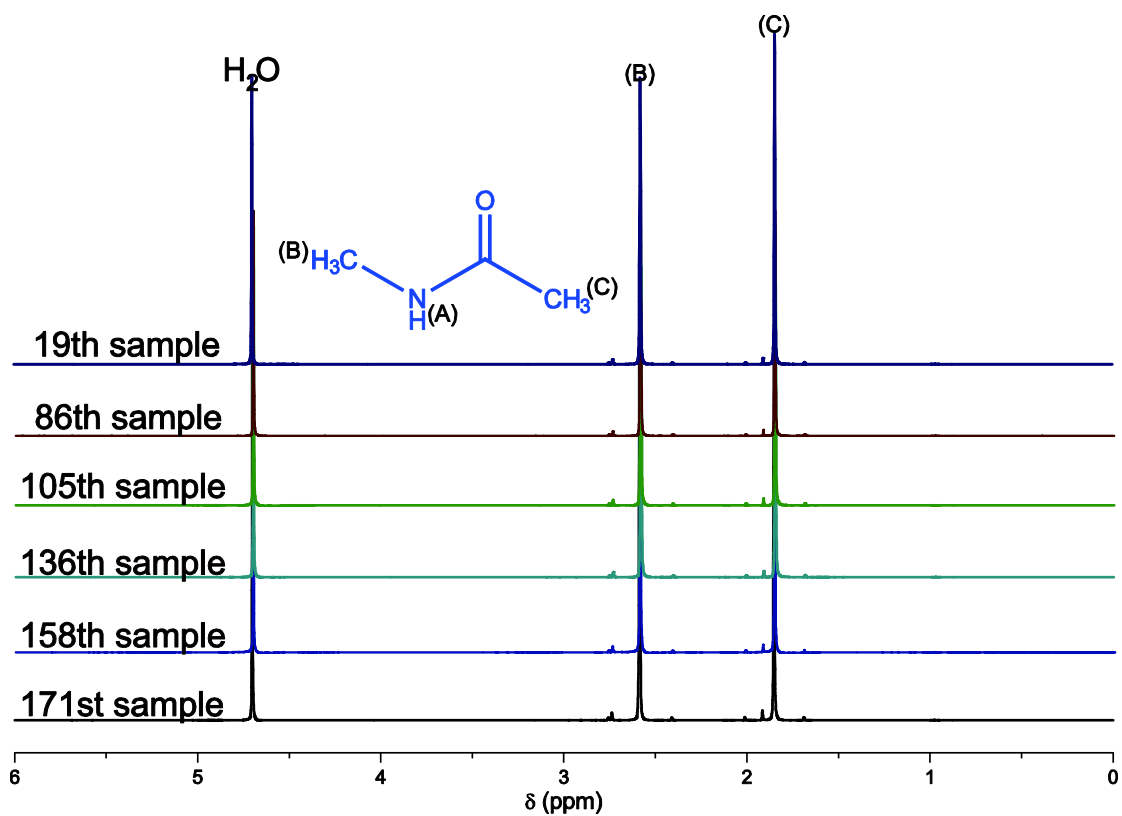

**Fig. S1** <sup>1</sup>H-NMR spectra of NMA at 298.15 K. The solvent is D<sub>2</sub>O and the concentration is 0.25 M. In order to make sure that the changes in chemical shift are not affected by the instability of equipments, the <sup>1</sup>H-NMR test for bulk solutions of NMA was repeated several times among 197 NMR tests.

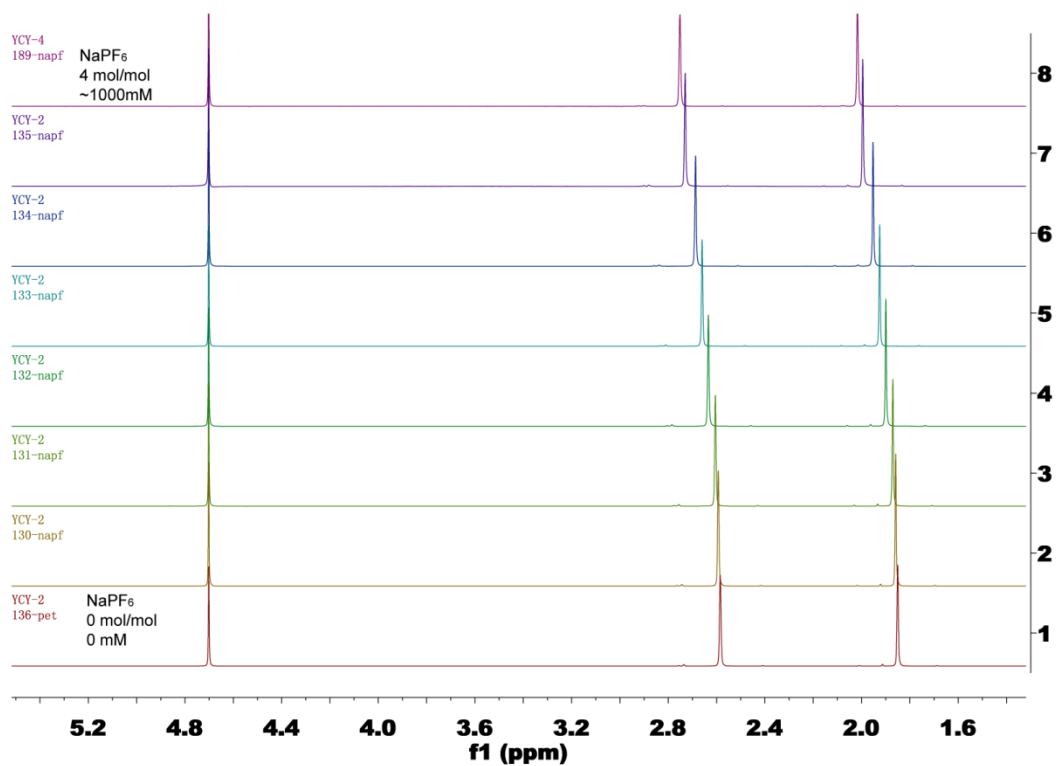

**Fig. S2** Original data of NaPF<sub>6</sub> effects on NMR spectra of NMA. The concentration of NMA was constantly 0.25 M while the concentration of NaPF<sub>6</sub> in sample solutions was decreasing from upper spectra to bottom.

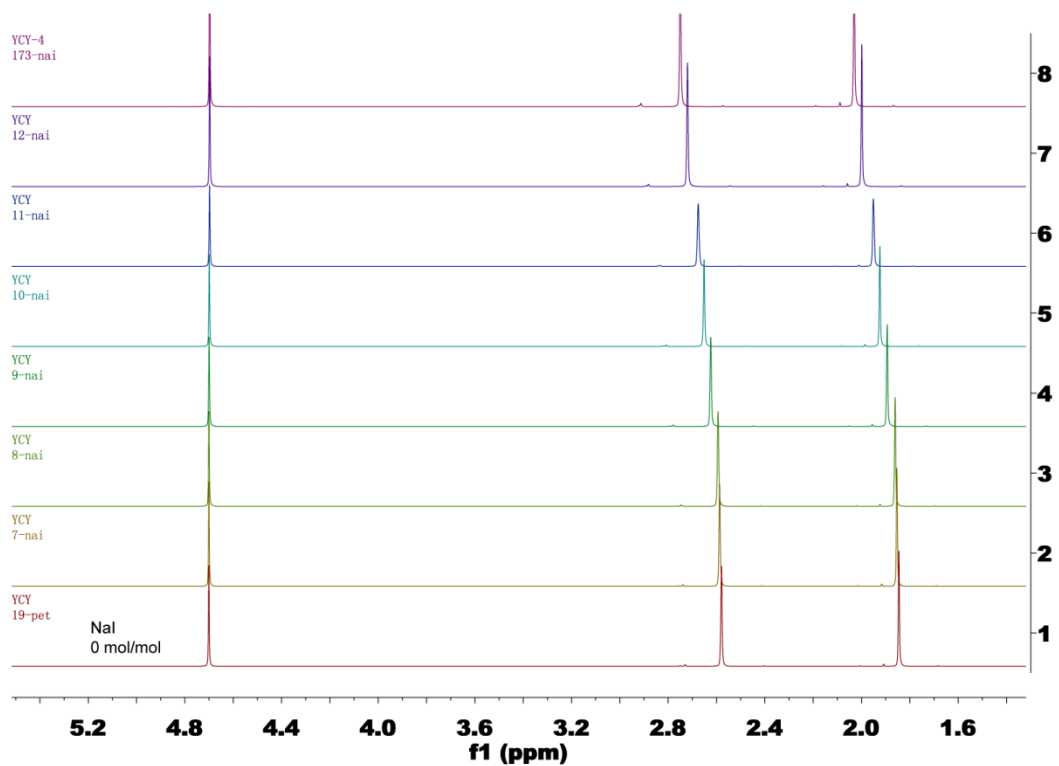

**Fig. S3** Original data of NaI effects on NMR spectra of NMA. The concentration of NMA was constantly 0.25 M while the concentration of NaI in sample solutions was decreasing from upper spectra to bottom.

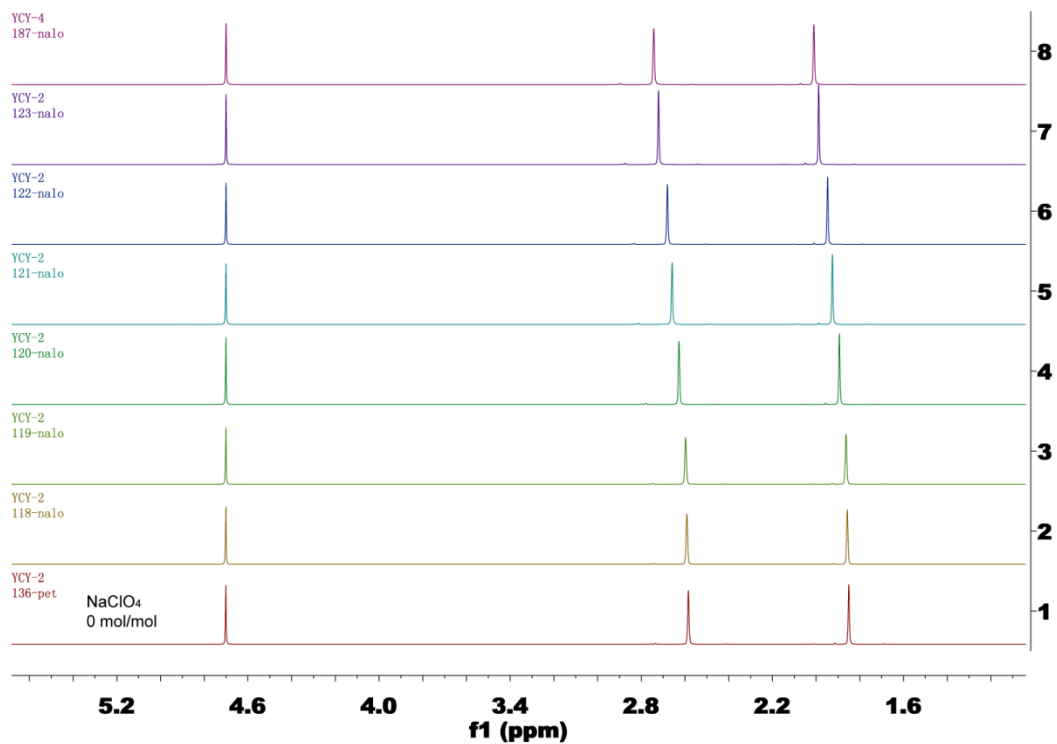

**Fig. S4** Original data of NaClO<sub>4</sub> effects on NMR spectra of NMA. The concentration of NMA was constantly 0.25 M while the concentration of NaClO<sub>4</sub> in sample solutions was decreasing from upper spectra to bottom.

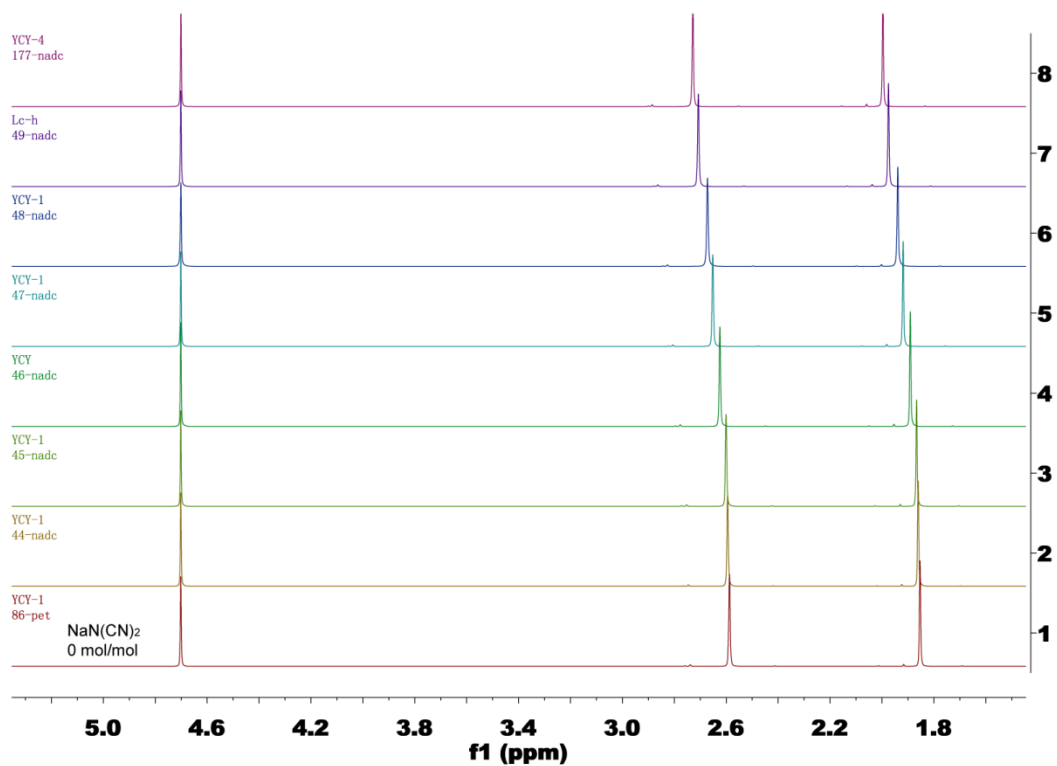

**Fig. S5** Original data of  $\text{NaN}(\text{CN})_2$  effects on NMR spectra of NMA. The concentration of NMA was constantly 0.25 M while the concentration of  $\text{NaN}(\text{CN})_2$  in sample solutions was decreasing from upper spectra to bottom.

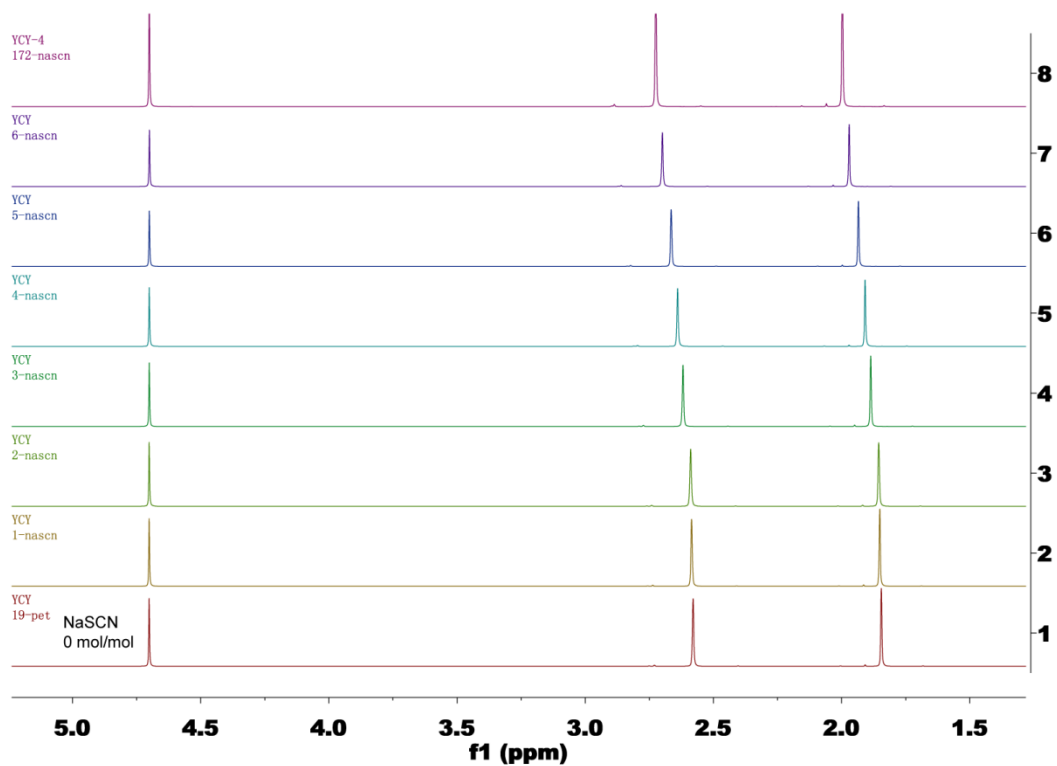

**Fig. S6** Original data of NaSCN effects on NMR spectra of NMA. The concentration of NMA was constantly 0.25 M while the concentration of NaSCN in sample solutions was decreasing from upper spectra to bottom.



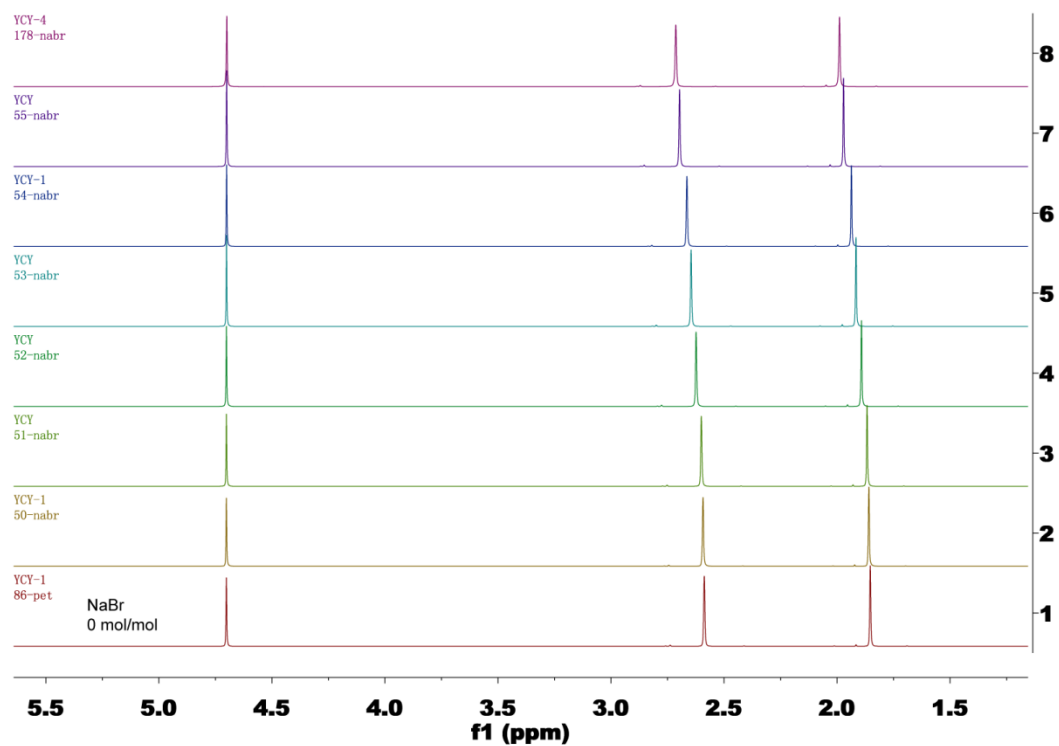

**Fig. S7** Original data of NaBr effects on NMR spectra of NMA. The concentration of NMA was constantly 0.25 M while the concentration of NaBr in sample solutions was decreasing from upper spectra to bottom.

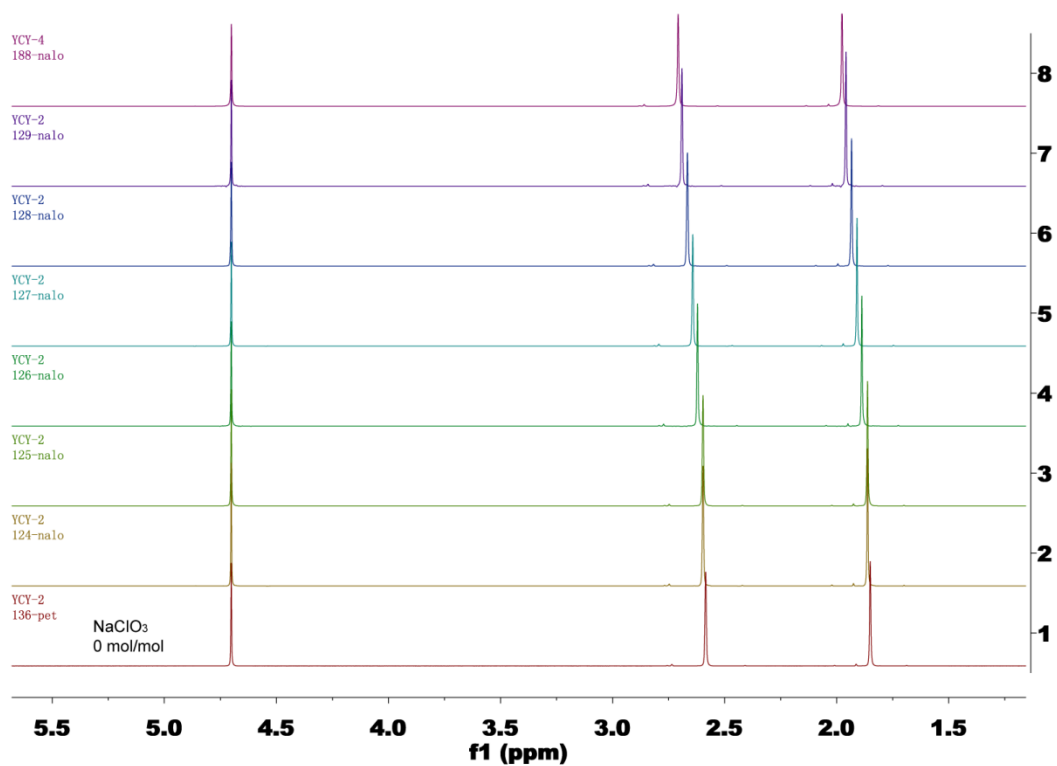

**Fig. S8** Original data of NaClO<sub>3</sub> effects on NMR spectra of NMA. The concentration of NMA was constantly 0.25 M while the concentration of NaClO<sub>3</sub> in sample solutions was decreasing from upper spectra to bottom.

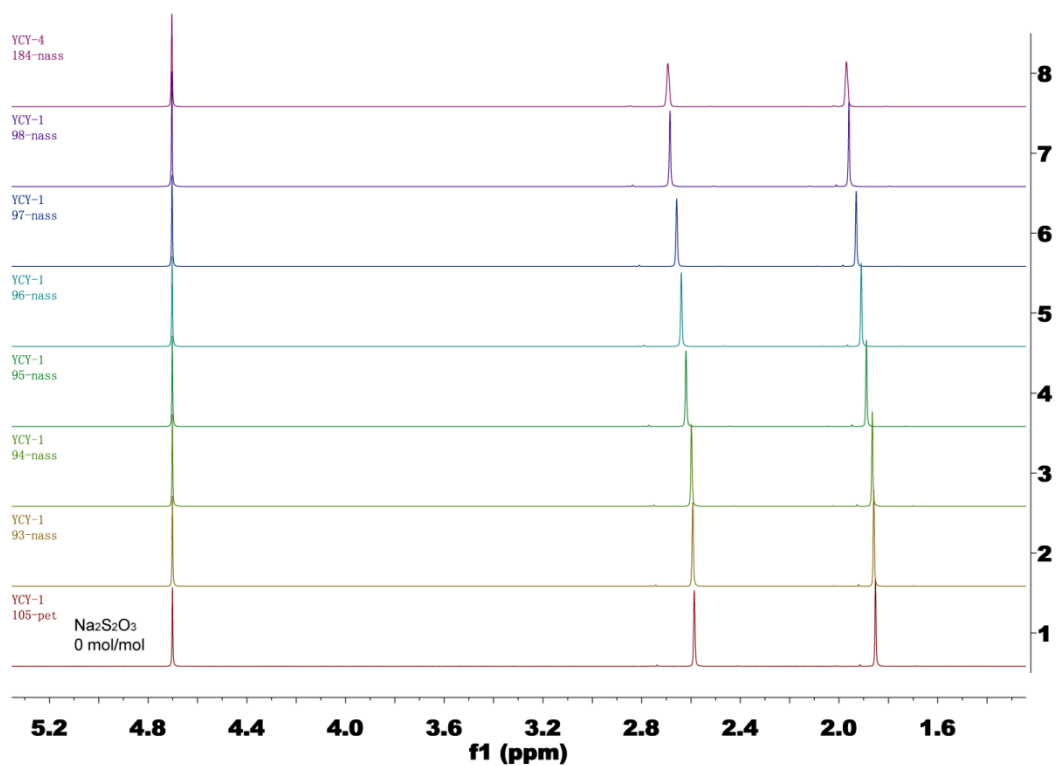

**Fig. S9** Original data of  $\text{Na}_2\text{S}_2\text{O}_3$  effects on NMR spectra of NMA. The concentration of NMA was constantly 0.25 M while the concentration of  $\text{NaClO}_3$  in sample solutions was decreasing from upper spectra to bottom.

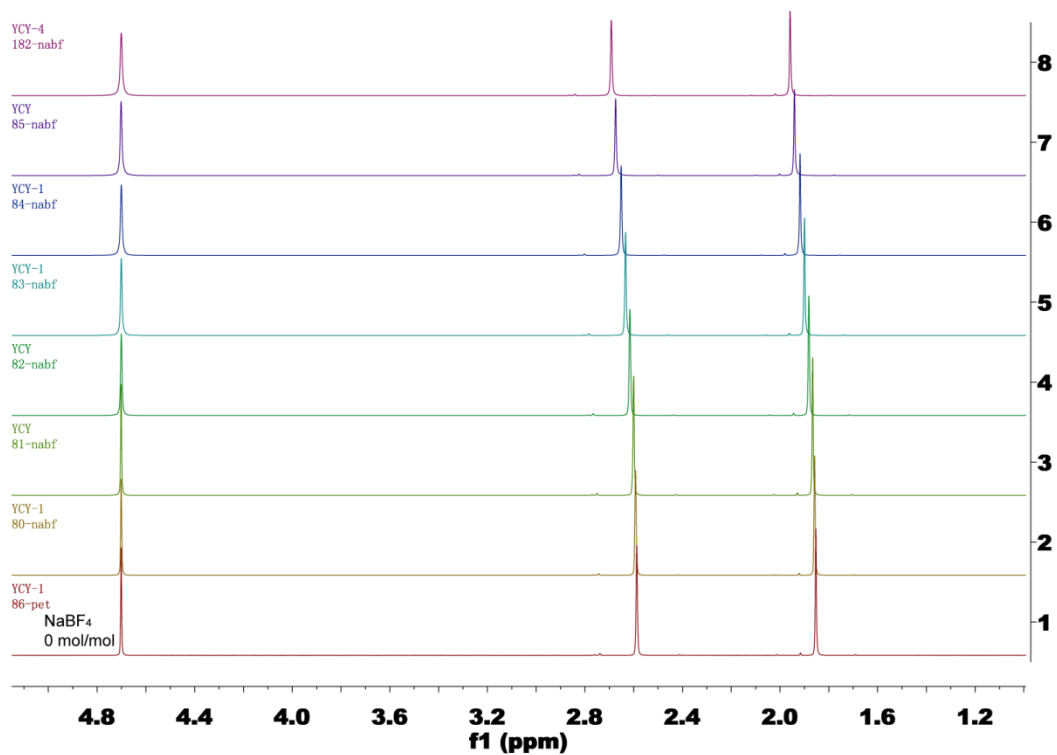

**Fig. S10** Original data of NaBF<sub>4</sub> effects on NMR spectra of NMA. The concentration of NMA was constantly 0.25 M while the concentration of NaBF<sub>4</sub> in sample solutions was decreasing from upper spectra to bottom.

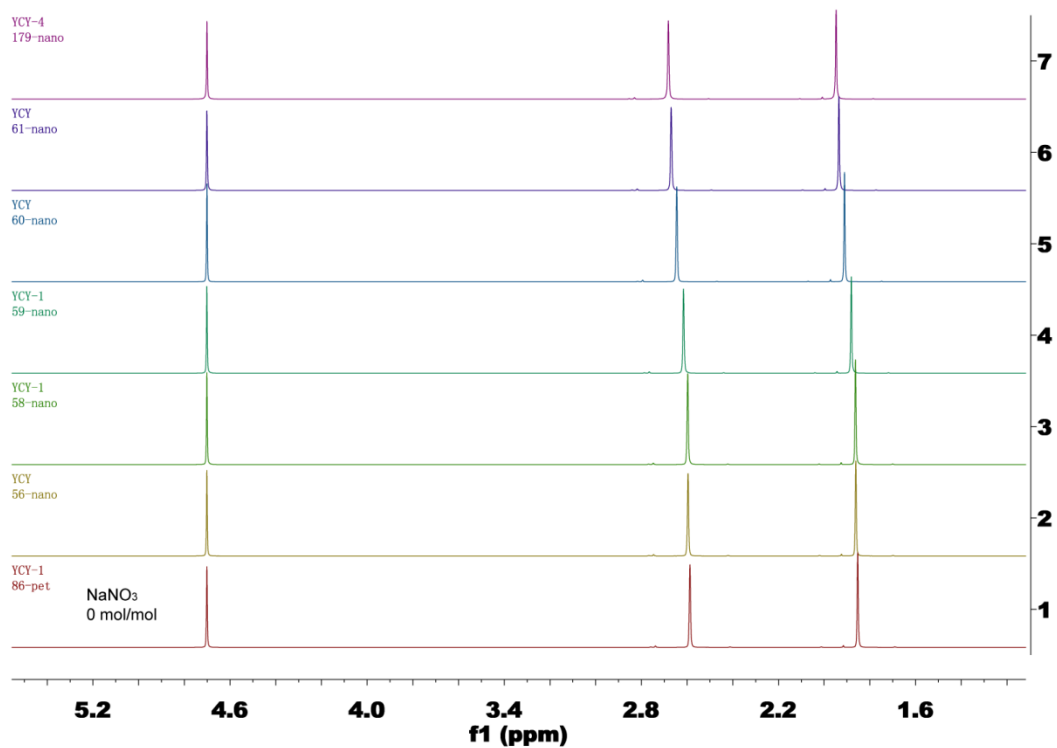

**Fig. S11** Original data of NaNO<sub>3</sub> effects on NMR spectra of NMA. The concentration of NMA was constantly 0.25 M while the concentration of NaNO<sub>3</sub> in sample solutions was decreasing from upper spectra to bottom.

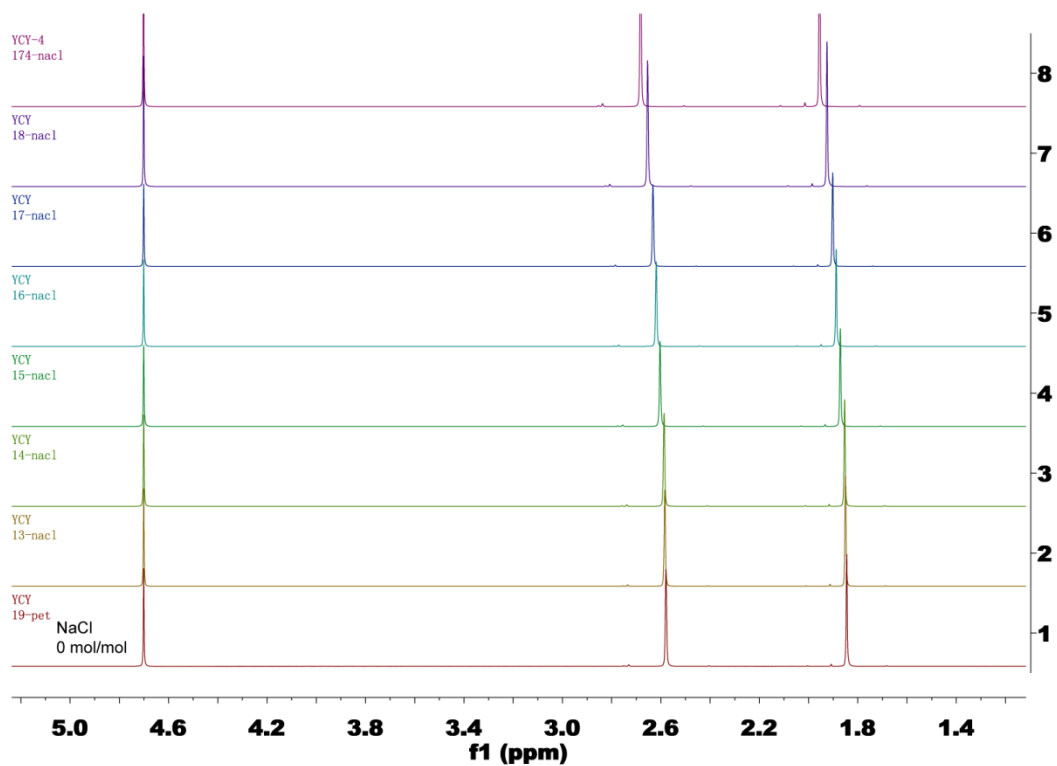

**Fig. S12** Original data of NaCl effects on NMR spectra of NMA. The concentration of NMA was constantly 0.25 M while the concentration of NaCl in sample solutions was decreasing from upper spectra to bottom.

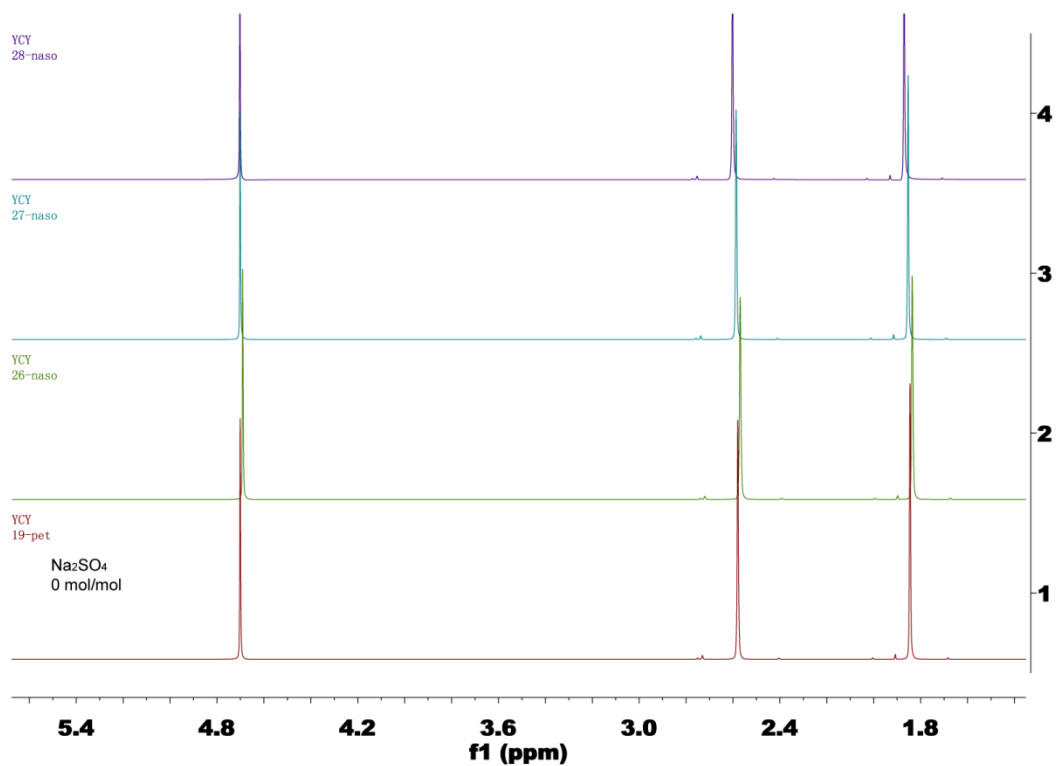

**Fig. S13** Original data of Na<sub>2</sub>SO<sub>4</sub> effects on NMR spectra of NMA. The concentration of NMA was constantly 0.25 M while the concentration of Na<sub>2</sub>SO<sub>4</sub> in sample solutions was decreasing from upper spectra to bottom.

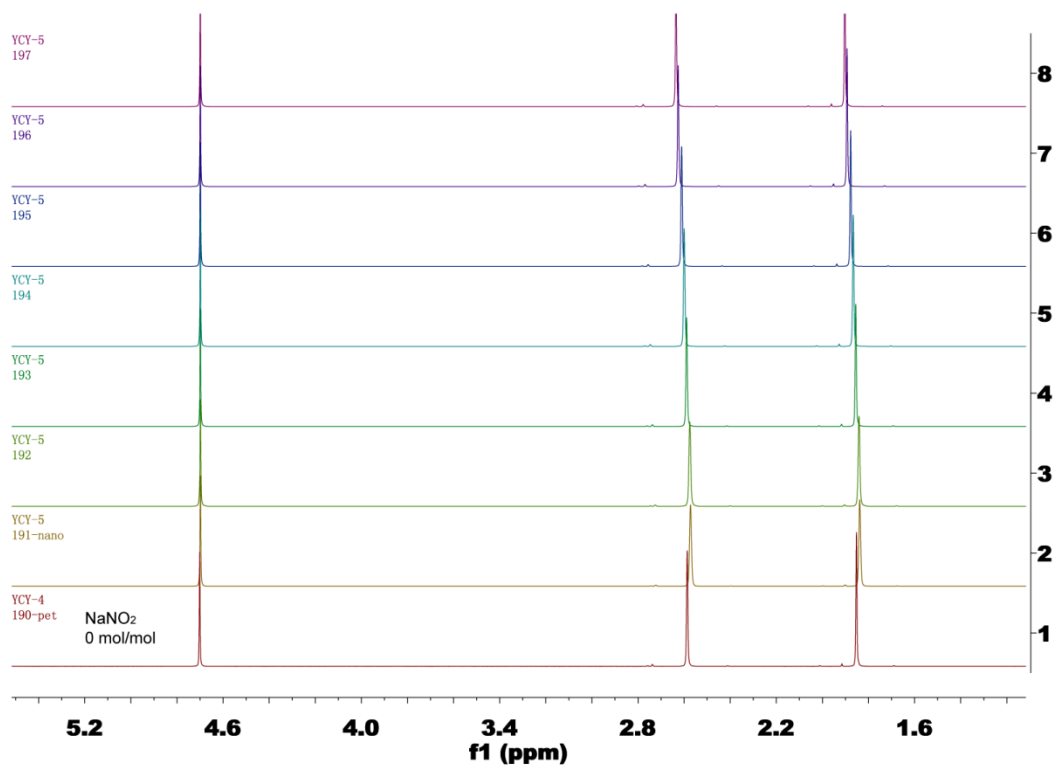

**Fig. S14** Original data of NaNO<sub>2</sub> effects on NMR spectra of NMA. The concentration of NMA was constantly 0.25 M while the concentration of NaNO<sub>2</sub> in sample solutions was decreasing from upper spectra to bottom.



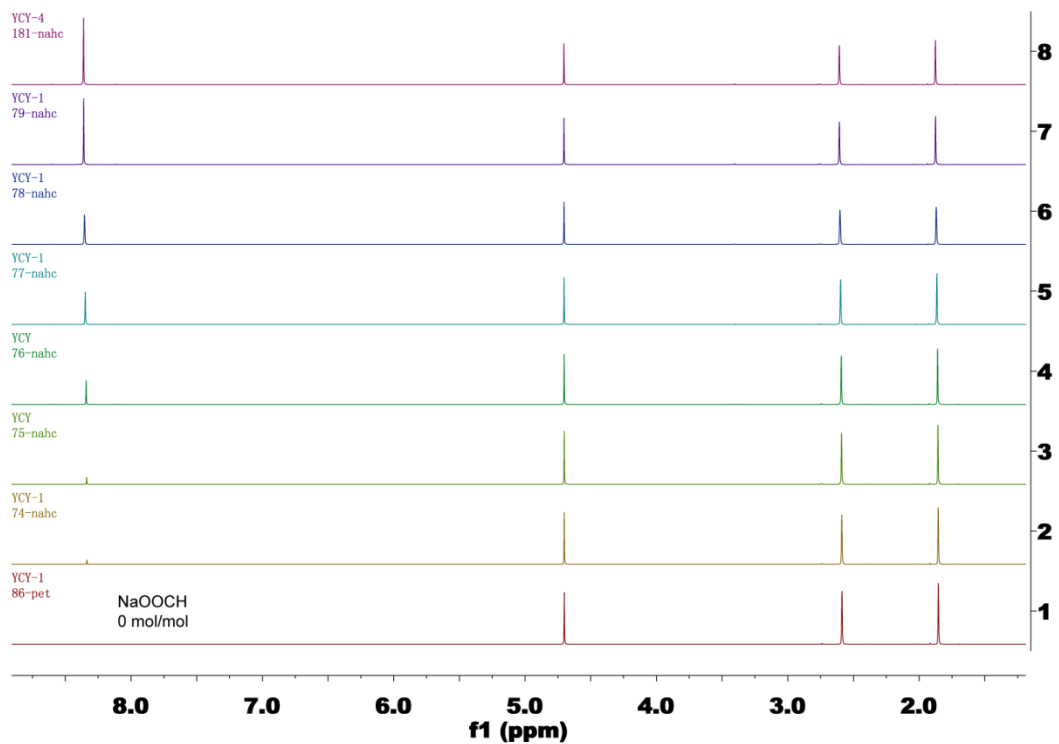

**Fig. S15** Original data of NaOOCH effects on NMR spectra of NMA. The concentration of NMA was constantly 0.25 M while the concentration of NaOOCH in sample solutions was decreasing from upper spectra to bottom.

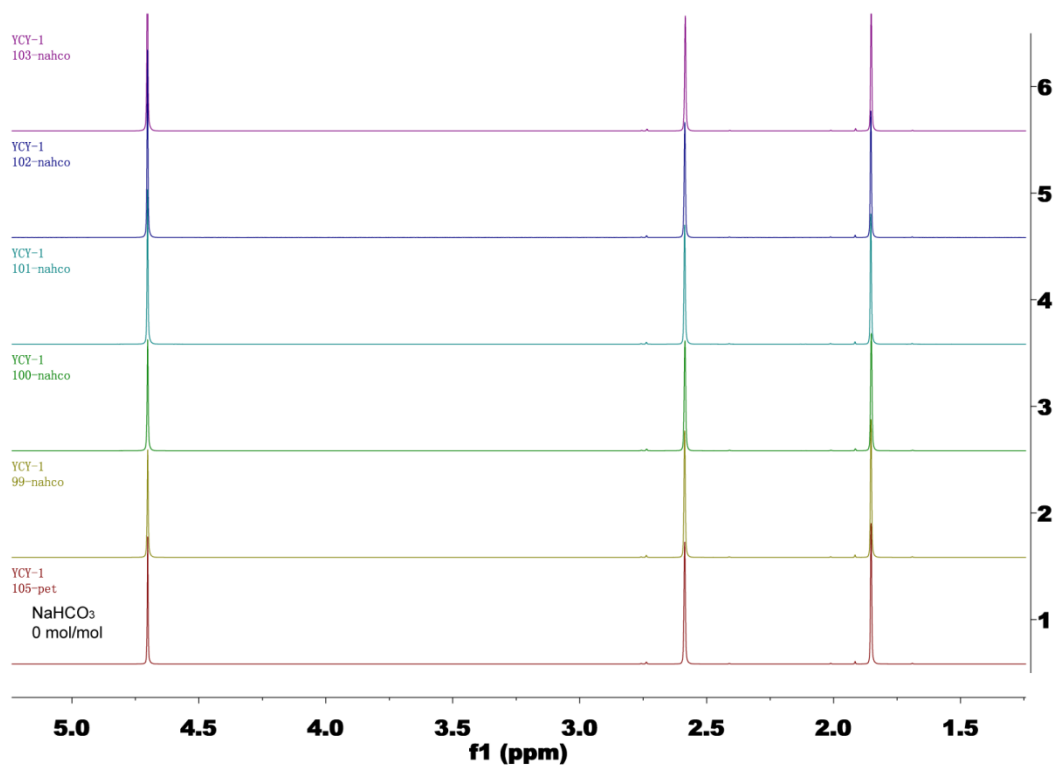

**Fig. S16** Original data of NaHCO<sub>3</sub> effects on NMR spectra of NMA. The concentration of NMA was constantly 0.25 M while the concentration of NaHCO<sub>3</sub> in sample solutions was decreasing from upper spectra to bottom.

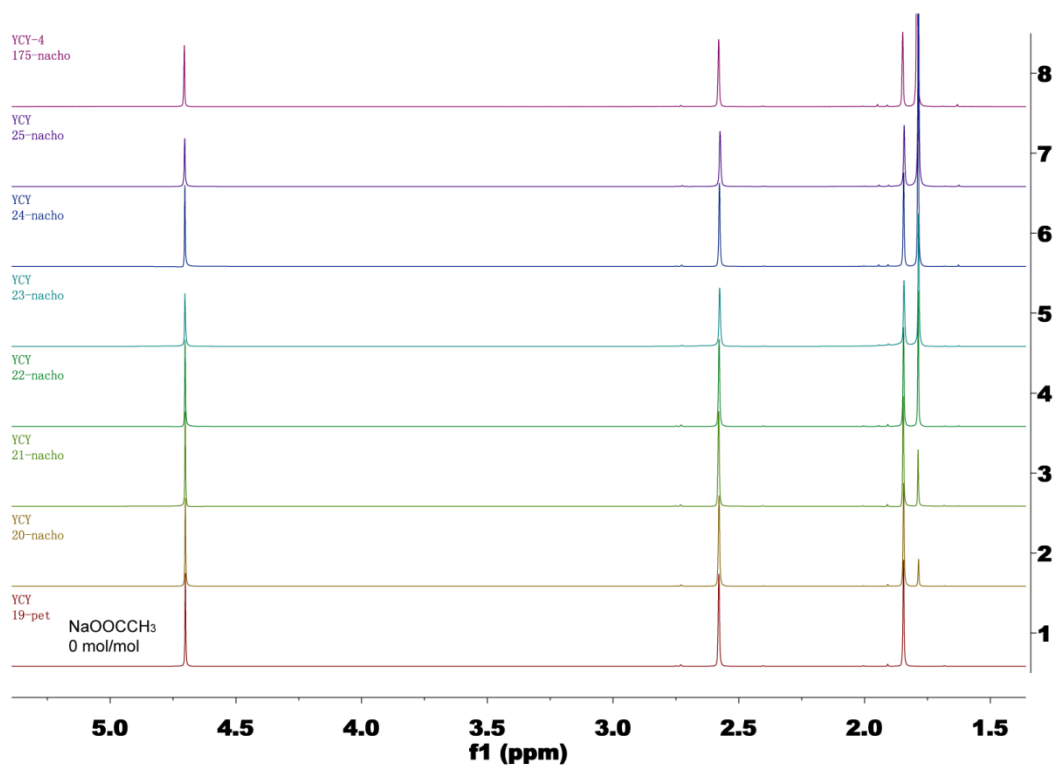

**Fig. S17** Original data of NaOOCCH<sub>3</sub> effects on NMR spectra of NMA. The concentration of NMA was constantly 0.25 M while the concentration of NaOOCCH<sub>3</sub> in sample solutions was decreasing from upper spectra to bottom.

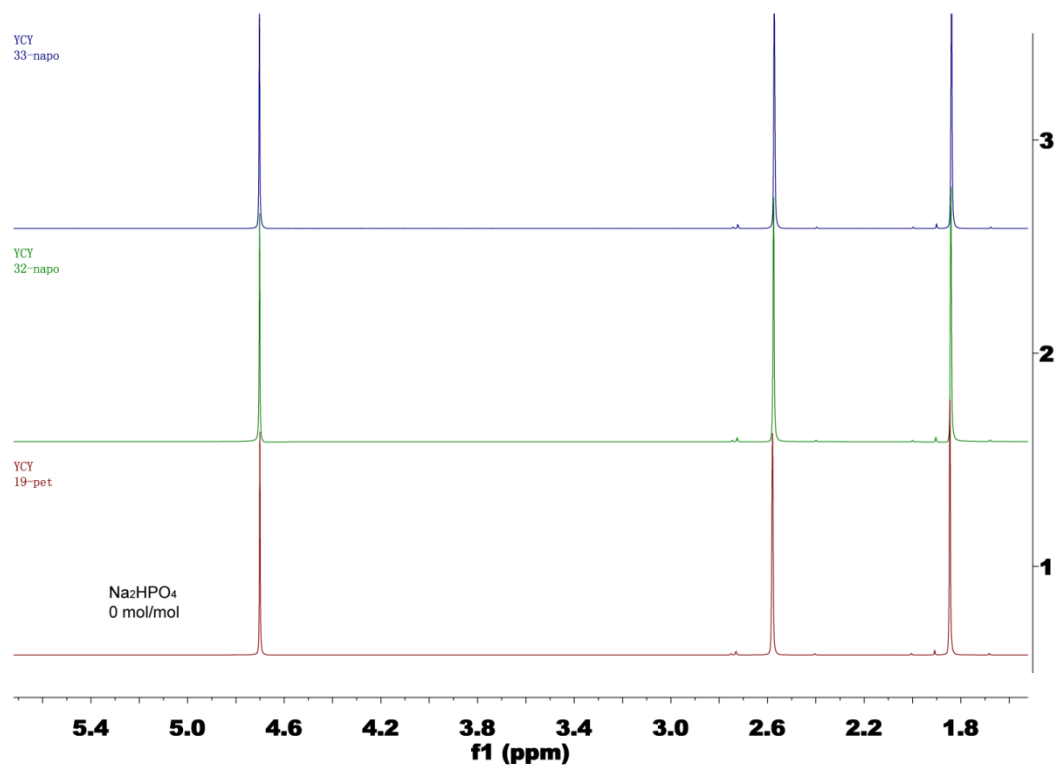

**Fig. S18** Original data of Na<sub>2</sub>HPO<sub>4</sub> effects on NMR spectra of NMA. The concentration of NMA was constantly 0.25 M while the concentration of Na<sub>2</sub>HPO<sub>4</sub> in sample solutions was decreasing from upper spectra to bottom.

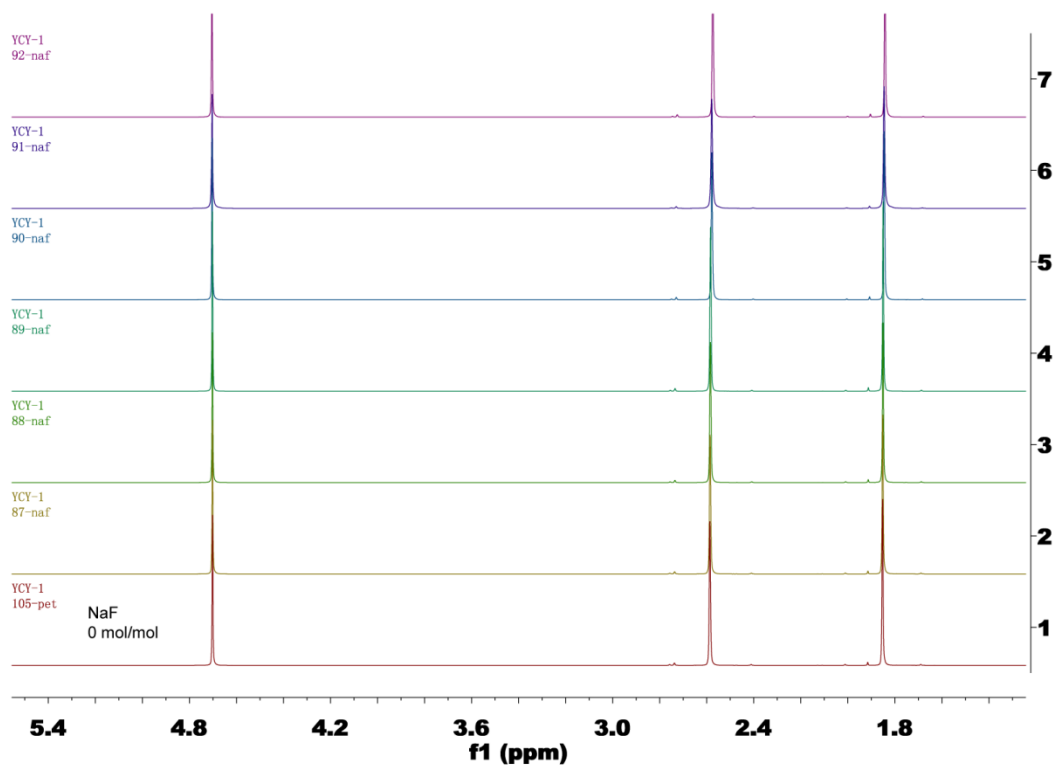

**Fig. S19** Original data of NaF effects on NMR spectra of NMA. The concentration of NMA was constantly 0.25 M while the concentration of NaF in sample solutions was decreasing from upper spectra to bottom.

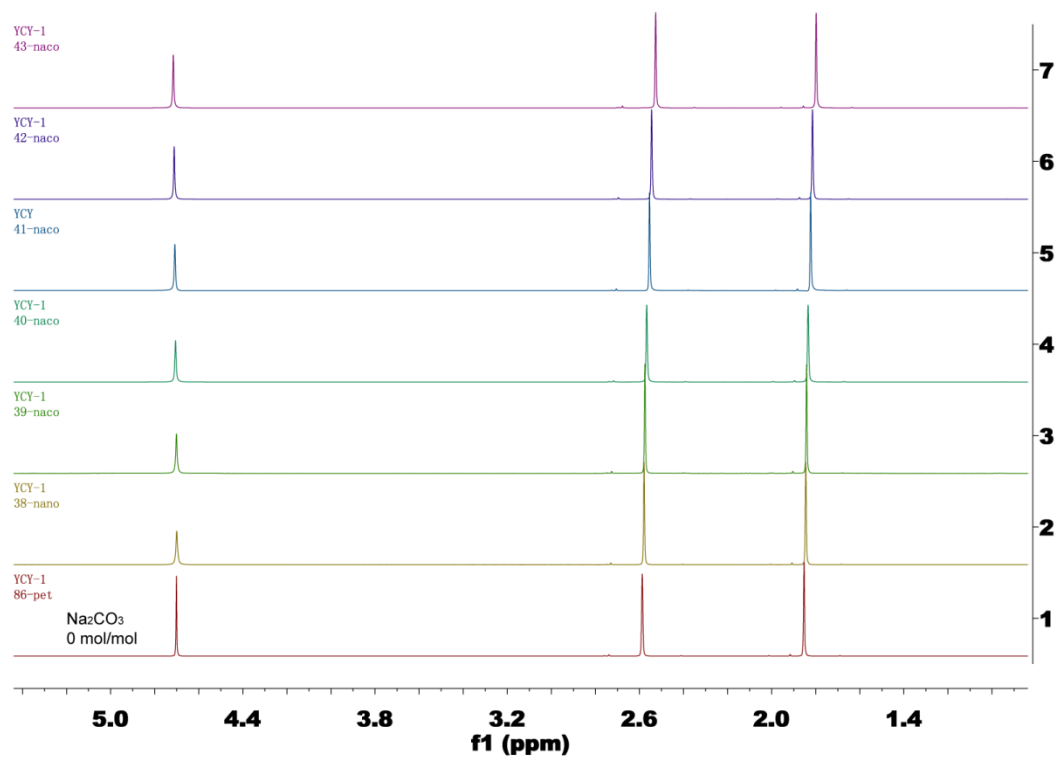

**Fig. S20** Original data of Na<sub>2</sub>CO<sub>3</sub> effects on NMR spectra of NMA. The concentration of NMA was constantly 0.25 M while the concentration of Na<sub>2</sub>CO<sub>3</sub> in sample solutions was decreasing from upper spectra to bottom.

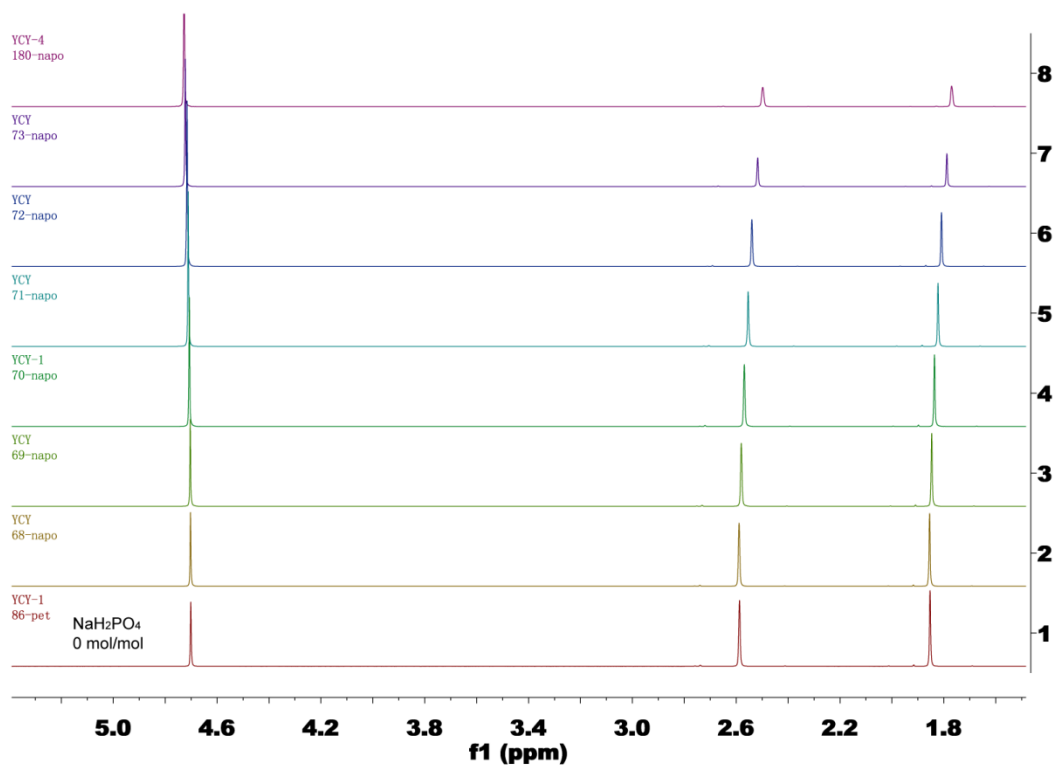

**Fig. S21** Original data of NaH<sub>2</sub>PO<sub>4</sub> effects on NMR spectra of NMA. The concentration of NMA was constantly 0.25 M while the concentration of NaH<sub>2</sub>PO<sub>4</sub> in sample solutions was decreasing from upper spectra to bottom.

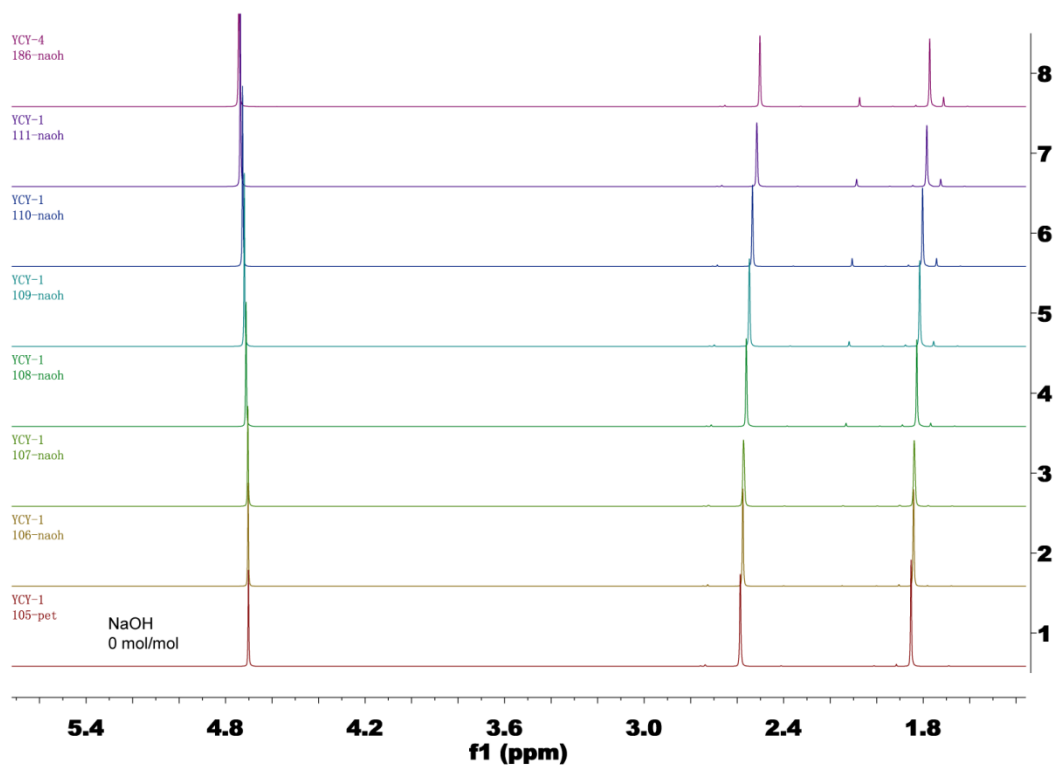

**Fig. S22** Original data of NaOH effects on NMR spectra of NMA. The concentration of NMA was constantly 0.25 M while the concentration of NaOH in sample solutions was decreasing from upper spectra to bottom.



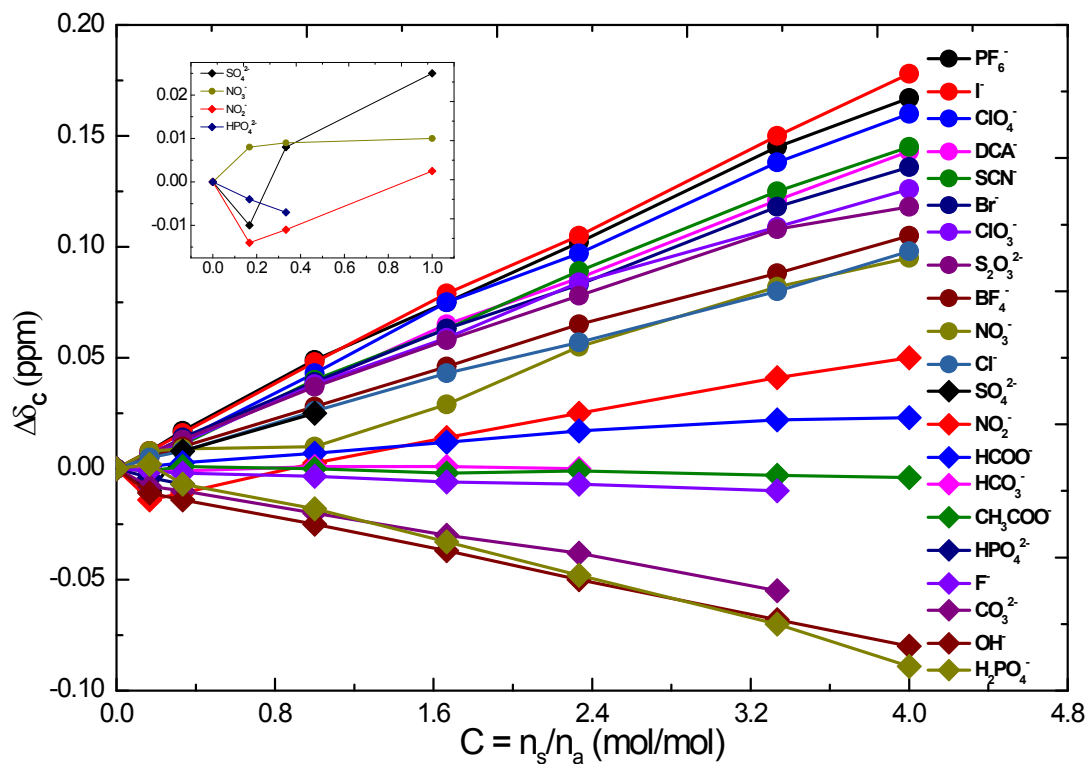

**Fig. S23** Anionic effects on proton C of NMA when the cations are  $\text{Na}^+$ . A nearly linear relationship exists between the changes in the chemical shift for C proton of NMA, and concentration of anions. The inserted figure is the enlarged display of the whole figure at the concentration from 0 to 1.0 mol/mol.

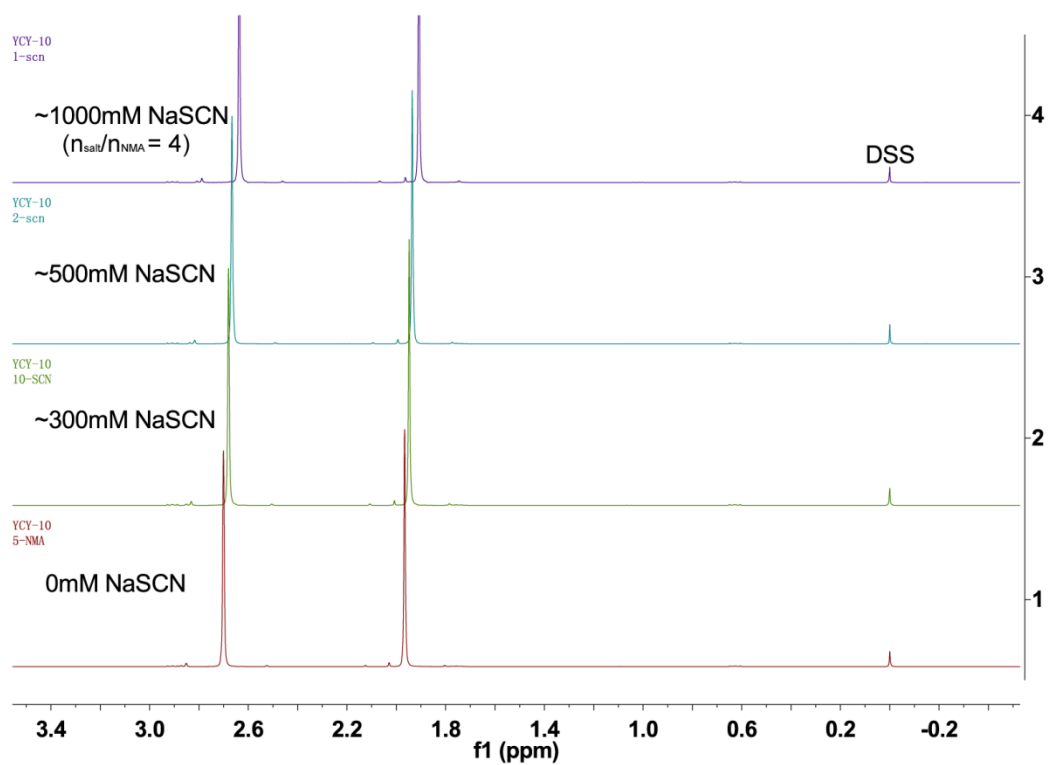

**Fig. S24** Original data of NaSCN effects on NMR spectra of NMA with DSS/D<sub>2</sub>O loaded in capillary tube as external reference. The concentration of NMA was constantly 0.25 M while the concentration of NaSCN in sample solutions was decreasing from upper spectra to bottom.



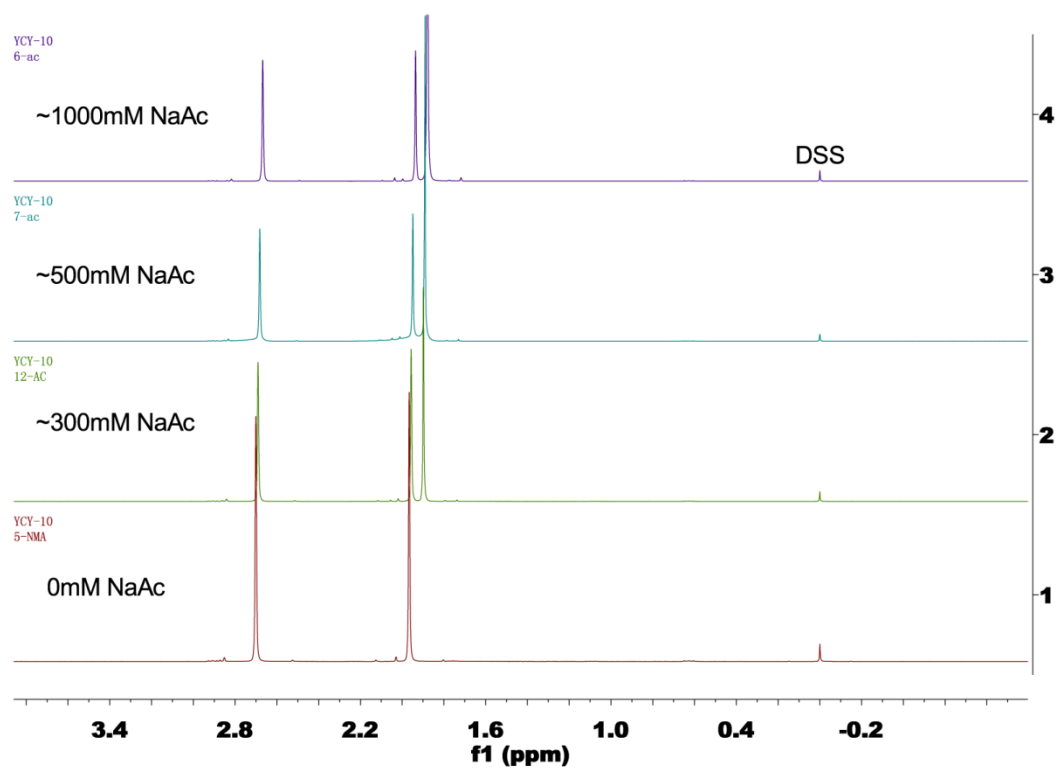

**Fig. S26** Original data of NaOOCCH<sub>3</sub> effects on NMR spectra of NMA with DSS/D<sub>2</sub>O loaded in capillary tube as external reference. The concentration of NMA was constantly 0.25 M while the concentration of NaOOCCH<sub>3</sub> in sample solutions was decreasing from upper spectra to bottom.

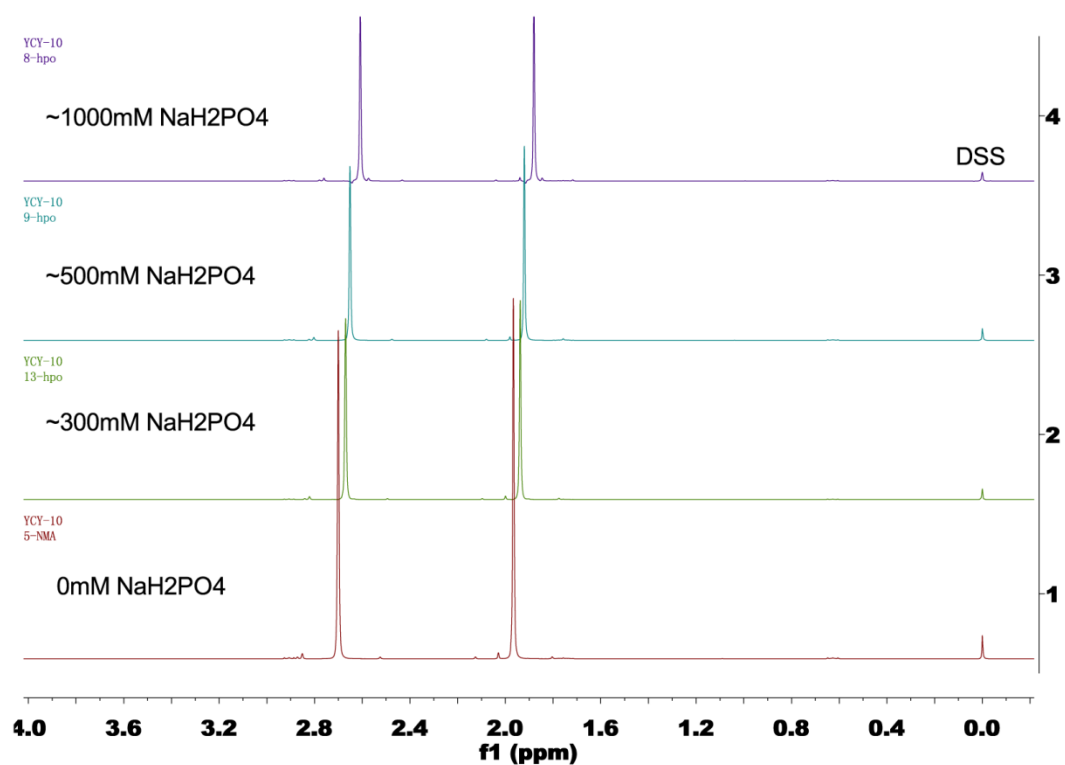

**Fig. S27** Original data of NaH<sub>2</sub>PO<sub>4</sub> effects on NMR spectra of NMA with DSS/D<sub>2</sub>O loaded in capillary tube as external reference. The concentration of NMA was constantly 0.25 M while the concentration of NaH<sub>2</sub>PO<sub>4</sub> in sample solutions was decreasing from upper spectra to bottom.

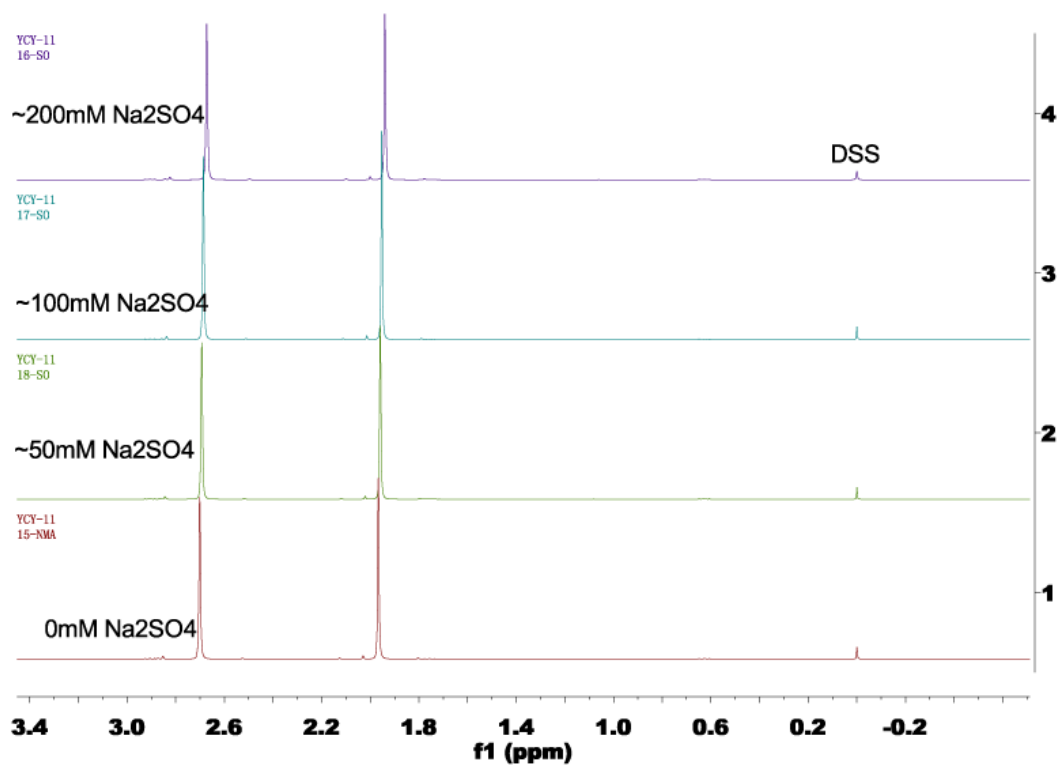

**Fig. S28** Original data of Na<sub>2</sub>SO<sub>4</sub> effects on NMR spectra of NMA with DSS/D<sub>2</sub>O loaded in capillary tube as external reference. The concentration of NMA was constantly 0.25 M while the concentration of Na<sub>2</sub>SO<sub>4</sub> in sample solutions was decreasing from upper spectra to bottom.

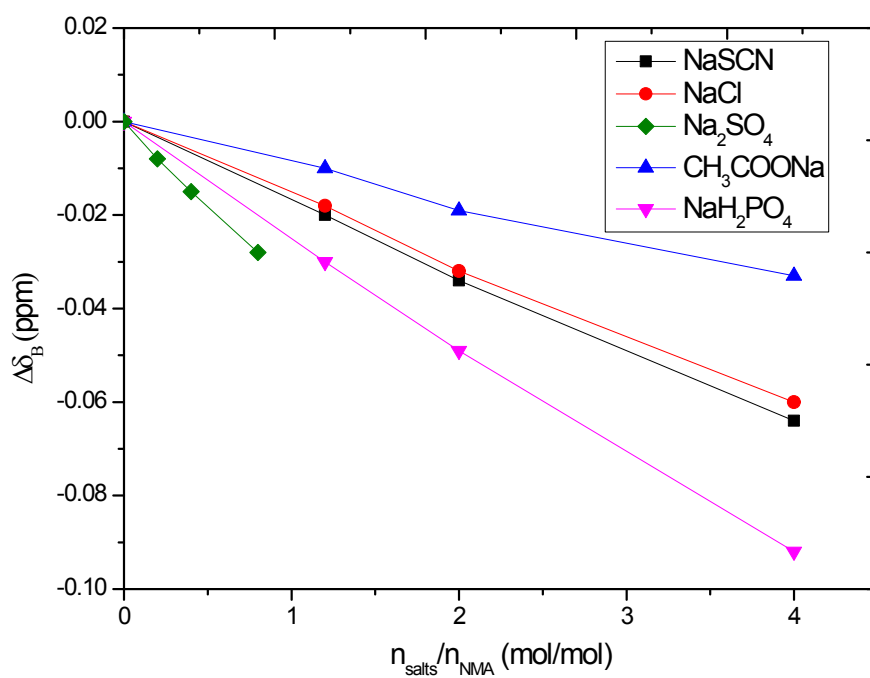

**Fig. S29** Plot of concentration against changes in chemical shifts of anionic effects on NMA with DSS/D<sub>2</sub>O loaded in capillary tube as external reference.

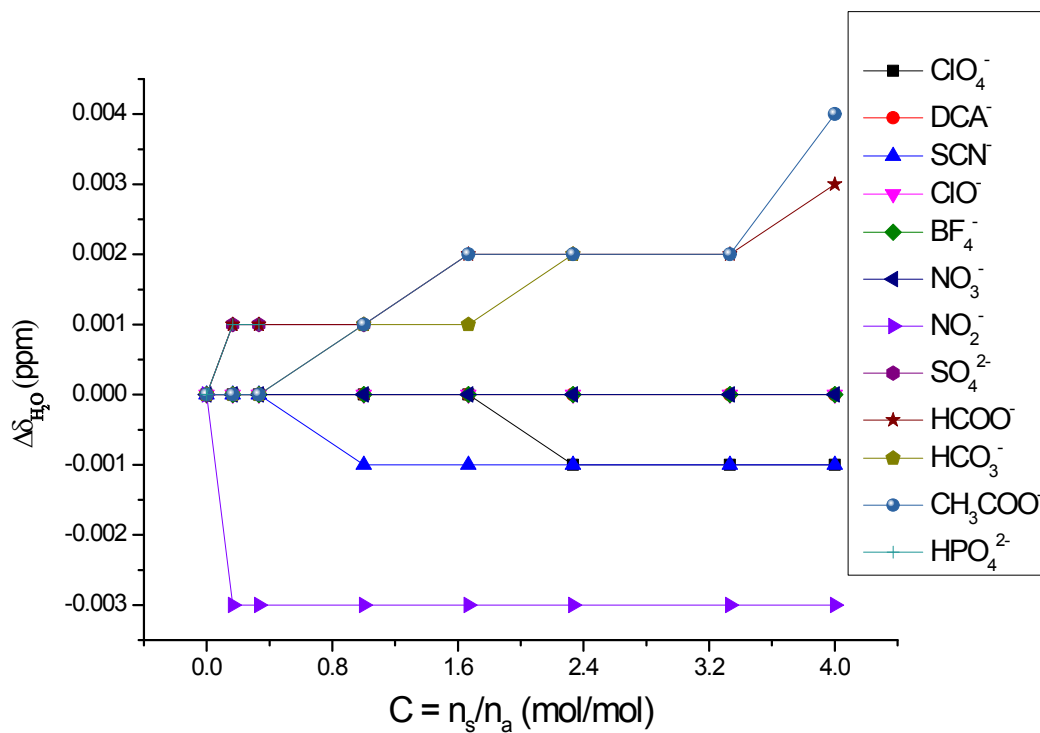

**Fig. S30** Anionic effects on water residue. Changes in chemical shift for proton of water residue at different concentrations by specific anions.



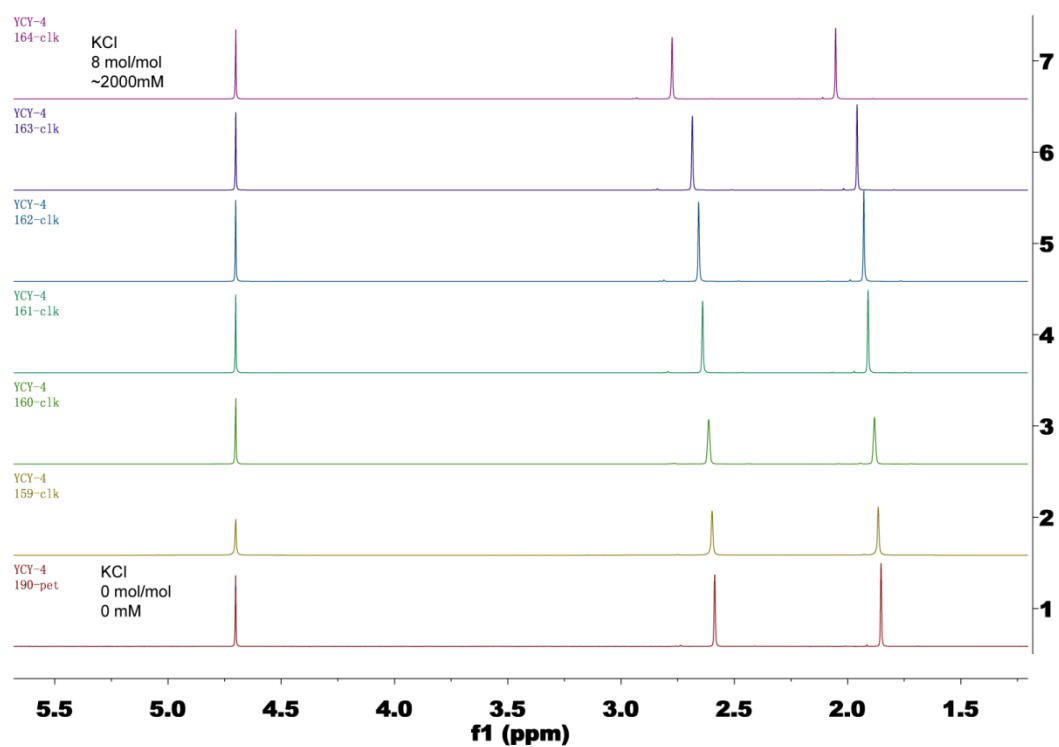

**Fig. S31** Original data of KCl effects on NMR spectra of NMA. The concentration of NMA was constantly 0.25 M while the concentration of KCl in sample solutions was decreasing from upper spectra to bottom.

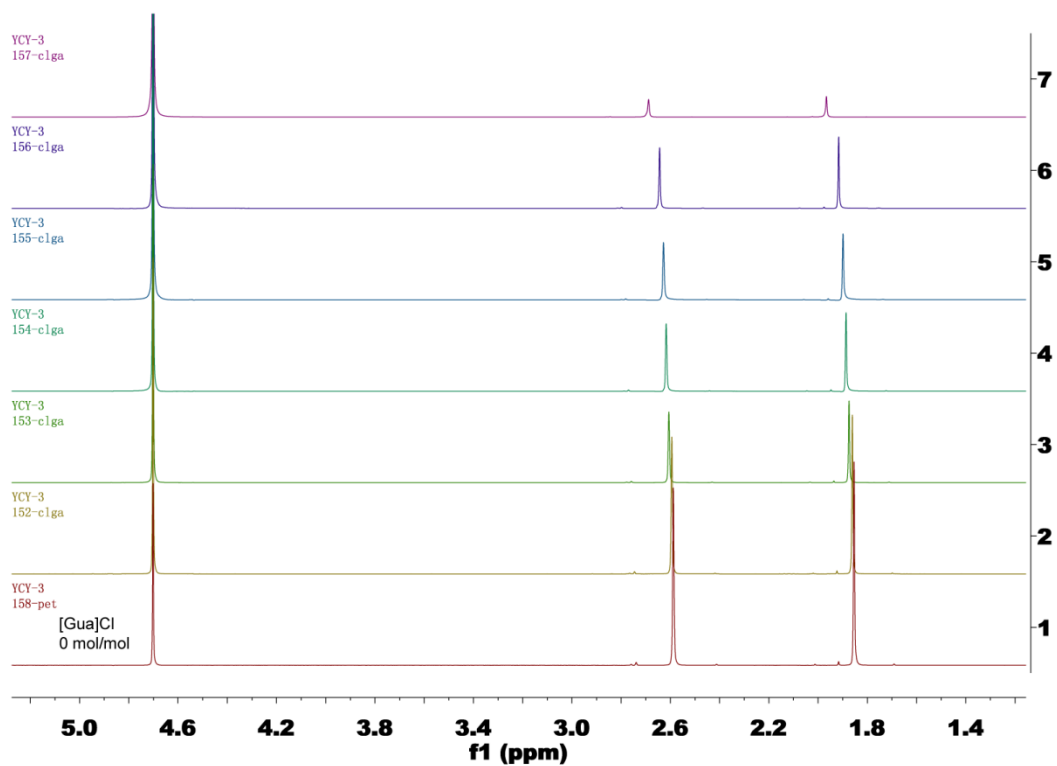

**Fig. S32** Original data of Guanidine hydrochloride ([Guanidium]Cl) effects on NMR spectra of NMA. The concentration of NMA was constantly 0.25 M while the concentration of [Guanidium]Cl in sample solutions was decreasing from upper spectra to bottom.

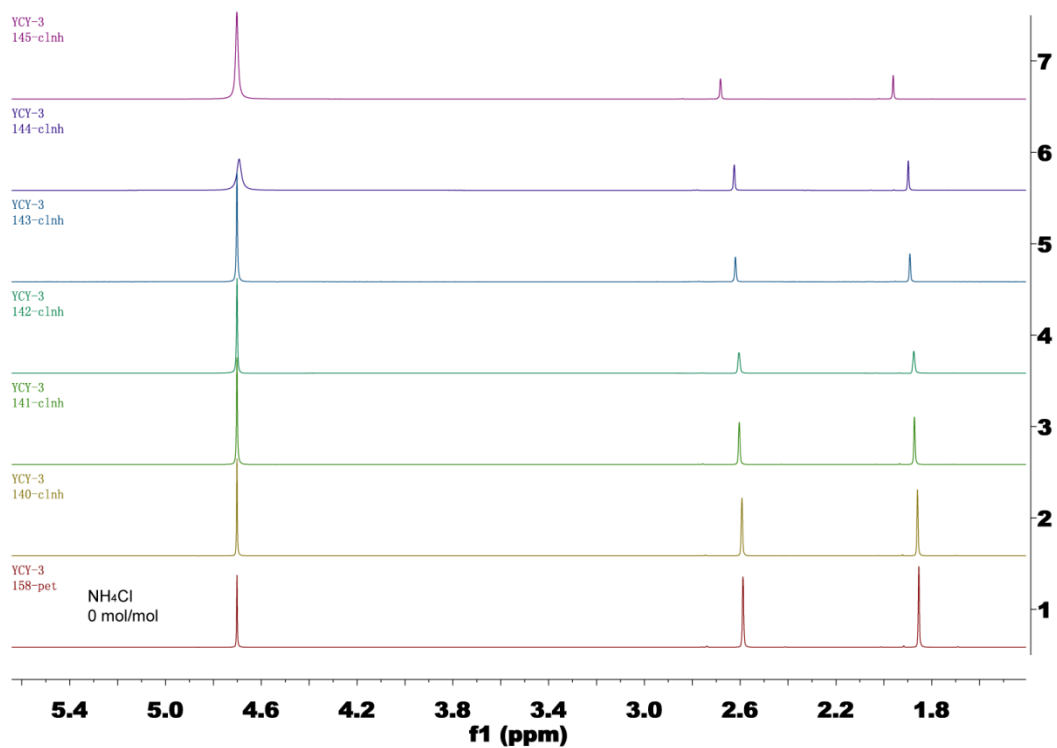

**Fig. S33** Original data of NH<sub>4</sub>Cl effects on NMR spectra of NMA. The concentration of NMA was constantly 0.25 M while the concentration of NH<sub>4</sub>Cl in sample solutions was decreasing from upper spectra to bottom.

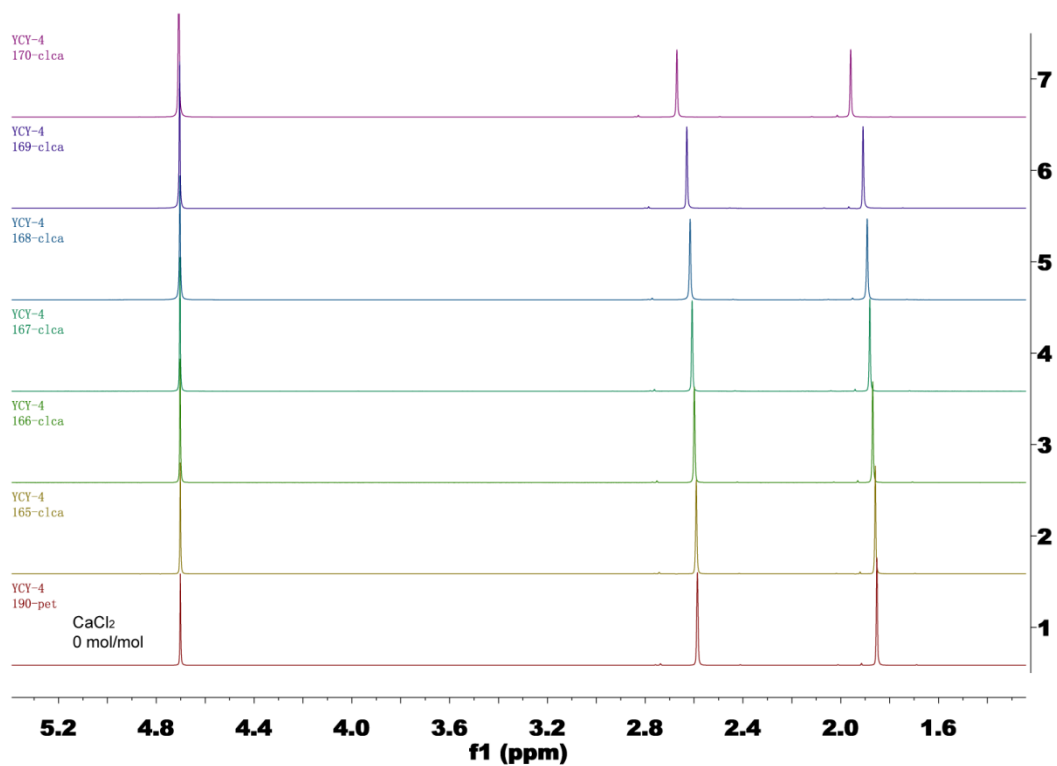

**Fig. S34** Original data of CaCl<sub>2</sub> effects on NMR spectra of NMA. The concentration of NMA was constantly 0.25 M while the concentration of CaCl<sub>2</sub> in sample solutions was decreasing from upper spectra to bottom.

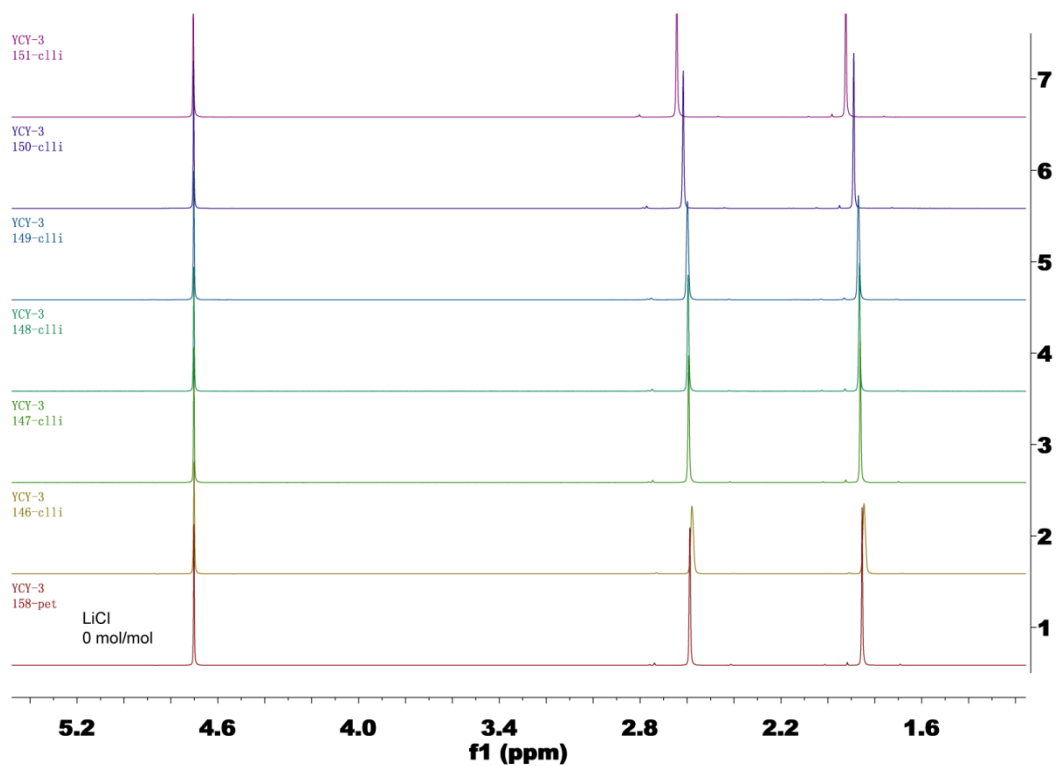

**Fig. S35** Original data of LiCl effects on NMR spectra of NMA. The concentration of NMA was constantly 0.25 M while the concentration of LiCl in sample solutions was decreasing from upper spectra to bottom.

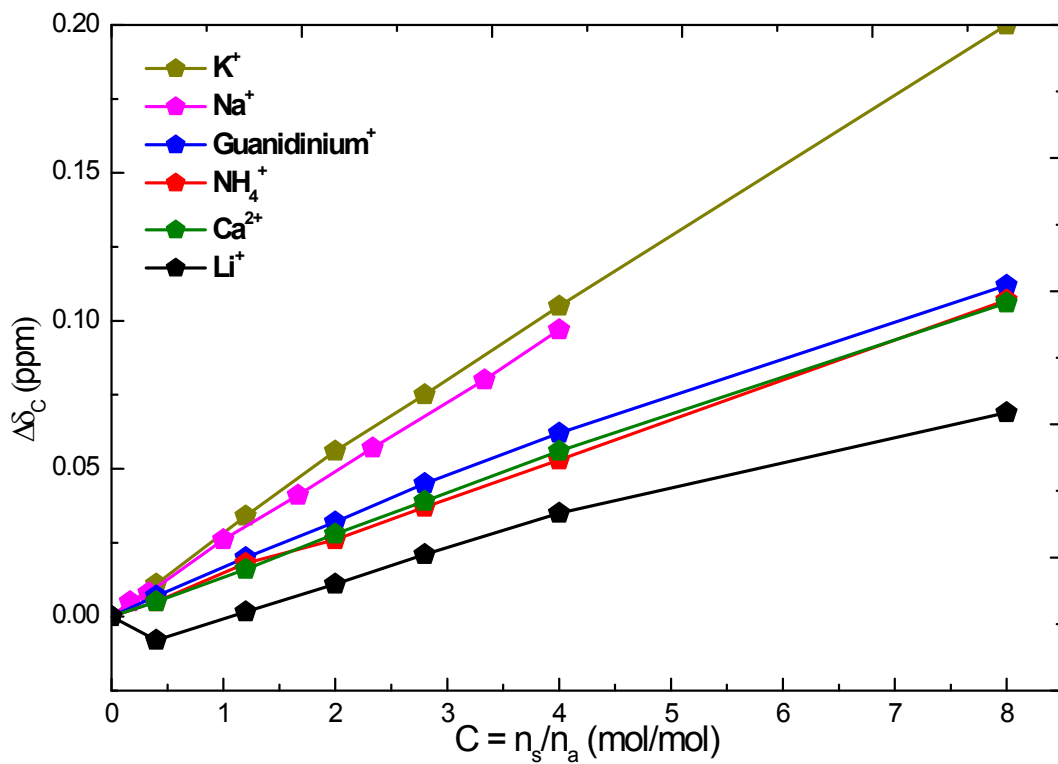

**Fig. S36** Cationic effects on proton C of NMA when anions are Cl<sup>-</sup>. A nearly linear relationship exists between the changes in the chemical shift for C proton of NMA, and concentration of cations.

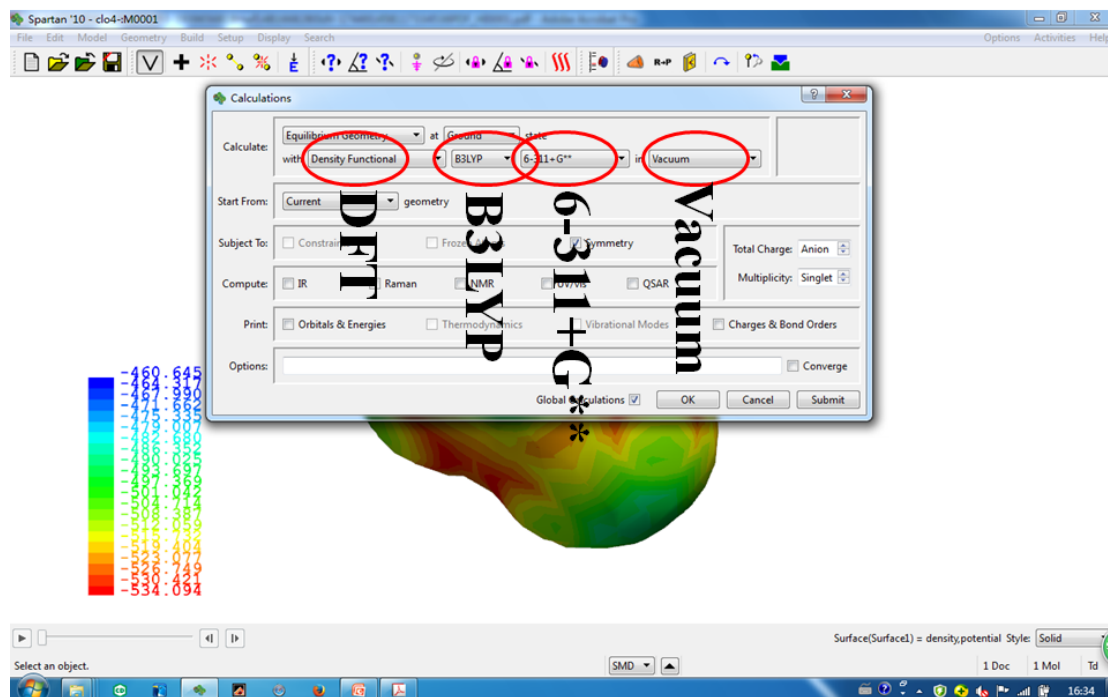

**Fig. S37** Setup of calculations: calculating items at DFT/B3LYP/6-311+G\*\* in vacuum environment with Spartan Software.

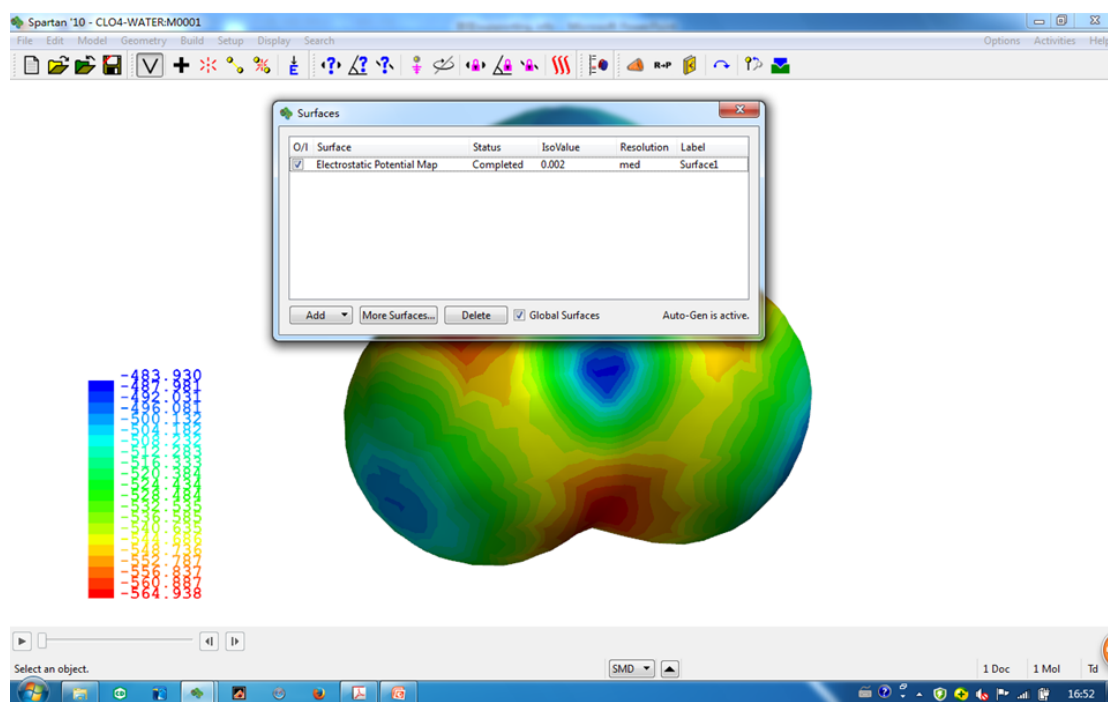

Fig. S38 Displaying of electrostatic potential map.







**Table. S1** Data of electrostatic potential surfaces in vacuum and water environments.

| Entry | Item                                        | EPS <sup>a</sup> (KJ/mol) |                    | Difference (%) =<br>  (EPS <sup>water</sup> -<br>EPS <sup>vacuum</sup> )/EPS <sup>vacuum</sup> | Difference (%) =<br>  (EPS <sub>vac</sub> <sup>6-31G**</sup> -<br>EPS <sub>vac</sub> <sup>6-311+G**</sup> )/EPS <sub>vac</sub> <sup>6-311+G**</sup> |
|-------|---------------------------------------------|---------------------------|--------------------|------------------------------------------------------------------------------------------------|-----------------------------------------------------------------------------------------------------------------------------------------------------|
|       |                                             | In vacuum                 | In water           |                                                                                                |                                                                                                                                                     |
| 1     | PF <sub>6</sub> <sup>-</sup>                | (-548.3, -467.3)          | (-549.3, -467.5)   | 0.2                                                                                            | 7                                                                                                                                                   |
| 2     | I <sup>-</sup>                              | NA <sup>b</sup>           | NA                 | -                                                                                              | -                                                                                                                                                   |
| 3     | ClO <sub>4</sub> <sup>-</sup>               | (-565.8, -485.9)          | (-564.9, -483.9)   | 0.2                                                                                            | 6                                                                                                                                                   |
| 4     | DCA <sup>-</sup>                            | (-551.7, -424.5)          | (-556.4, -418.1)   | 0.9                                                                                            | 2                                                                                                                                                   |
| 5     | SCN <sup>-</sup>                            | (-580.7, -448.7)          | (-597.6, -432.2)   | 3                                                                                              | 2                                                                                                                                                   |
| 6     | Br <sup>-</sup>                             | (-633.4, -627.7)          | (-633.4, -627.7)   | 0                                                                                              | 6                                                                                                                                                   |
| 7     | ClO <sub>3</sub> <sup>-</sup>               | (-640.8, -403.6)          | (-655.8, -374.1)   | 2                                                                                              | 6                                                                                                                                                   |
| 8     | S <sub>2</sub> O <sub>3</sub> <sup>2-</sup> | (-1062.4, -836.8)         | (-1062.5, -823.4)  | 0                                                                                              | 7                                                                                                                                                   |
| 9     | BF <sub>4</sub> <sup>-</sup>                | (-616.1, -534.5)          | NA                 | -                                                                                              | 8                                                                                                                                                   |
| 10    | NO <sub>3</sub> <sup>-</sup>                | (-664.9, -500.1)          | (-665.6, -502.4)   | 0.1                                                                                            | 6                                                                                                                                                   |
| 11    | Cl <sup>-</sup>                             | (-680.5, -669.8)          | (-680.5, -669.8)   | 0                                                                                              | 7                                                                                                                                                   |
| 12    | SO <sub>4</sub> <sup>2-</sup>               | (-1122.8, -980.0)         | (-1125.4, -983.9)  | 0.3                                                                                            | 7                                                                                                                                                   |
| 13    | NO <sub>2</sub> <sup>-</sup>                | (-741.4, -579.8)          | (-743.3, -578.8)   | 0.3                                                                                            | 10                                                                                                                                                  |
| 14    | HCOO <sup>-</sup>                           | (-723.7, -446.8)          | (-736.9, -423.4)   | 2                                                                                              | 5                                                                                                                                                   |
| 15    | HCO <sub>3</sub> <sup>-</sup>               | (-691.0, -260.8)          | (-725.1, -202.2)   | 5                                                                                              | 6                                                                                                                                                   |
| 16    | CH <sub>3</sub> COO <sup>-</sup>            | (-727.2, -330.1)          | (-770.7, -294.2)   | 6                                                                                              | 5                                                                                                                                                   |
| 17    | HPO <sub>4</sub> <sup>2-</sup>              | (-1135.7, -689.6)         | (-1171.4, -599.9)  | 3                                                                                              | 6                                                                                                                                                   |
| 18    | F <sup>-</sup>                              | (-908.8, -877.8)          | (-908.8, -877.8)   | 0                                                                                              | 16                                                                                                                                                  |
| 19    | CO <sub>3</sub> <sup>2-</sup>               | (-1278.6, -1078.8)        | (-1280.9, -1079.9) | 0.2                                                                                            | 10                                                                                                                                                  |
| 20    | H <sub>2</sub> PO <sub>4</sub> <sup>-</sup> | (-631.0, -186.5)          | (-670.4, -129.5)   | 6                                                                                              | 4                                                                                                                                                   |
| 21    | OH <sup>-</sup>                             | (-865.3, -530.2)          | (-874.0, -515.8)   | 1                                                                                              | 9                                                                                                                                                   |
| 22    | K <sup>+</sup>                              | (+826.5, +860.4)          | NA                 | -                                                                                              | -                                                                                                                                                   |
| 23    | Na <sup>+</sup>                             | (+1063.6, +1127.6)        | NA                 | -                                                                                              | -                                                                                                                                                   |
| 24    | Gdm <sup>+</sup>                            | (+403.0, +669.6)          | (+403.1, +683.5)   | 0                                                                                              | 0.5                                                                                                                                                 |
| 25    | NH <sub>4</sub> <sup>+</sup>                | (+735.2, +817.8)          | (+739.1, +817.6)   | 0.5                                                                                            | 0.4                                                                                                                                                 |
| 26    | Ca <sup>2+</sup>                            | (+1814.3, +1885.0)        | NA                 | -                                                                                              | -                                                                                                                                                   |
| 27    | Li <sup>+</sup>                             | (+1440.9, +1562.9)        | NA                 | -                                                                                              | -                                                                                                                                                   |
| 28    | NMA                                         | (-211.4, +209.2)          | (-256.4, +255.1)   | 20 <sup>c</sup>                                                                                | 2                                                                                                                                                   |
| 29    | d-NMA                                       | (-211.4, +209.2)          | (-256.8, +258.8)   | 20                                                                                             | 2                                                                                                                                                   |
| 30    | H <sub>2</sub> O                            | (-186.3, +211.2)          | (-191.3, +221.7)   | 3                                                                                              | 8                                                                                                                                                   |
| 31    | D <sub>2</sub> O                            | (-186.3, +211.2)          | (-191.3, +221.7)   | 3                                                                                              | 8                                                                                                                                                   |

Note: **a.** EPS stands for electrostatic potential surface, the data was recorded as “(the most positive value, the most negative value)”; **b.** NA stands for non-allowed, since some specific calculations are not possible because each basis set has its limits. For example, it’s impossible for to be calculable in water environment after adding polarization function (which is represented by “+” in 6-311+G\*\*) to water molecules because “in water environment” means the number of surrounding water molecules is infinite. And, 6-31G\*\* is more appropriate for calculations for atom number below 30, thus it’s not very reliable for iodide and bromide anion. And EPS

calculations are non-allowed for metal cation and  $\text{BF}_4^-$  anion in water environment for some much more complex issues that it's impossible to clarify them in a single work. It's sadly true that there is no such a versatile basis set. However, in reality, DFT/B3LYP/6-311+G\*\* is widely applied in calculating EPS and usually in vacuum environment. Thus, the results from DFT/B3LYP/6-311+G\*\* are used in discussion since that the small and proportional differences between 6-311+G\*\* and 6-31G\*\* cause no rearrangement for anionic and cationic series, and that the tiny differences between water and vacuum environments also cause no rearrangement for anionic series; **c.** After taking hydration effects into account, the NMA molecule becomes 20% more polarized. The increment possibly results from shifts of peptide bond from type I to type II because of hydration. Nevertheless, carbonyl oxide is still more negative than oxide atoms of water so that it's still reasonable that cations such  $\text{Na}^+$  would prefer interacting with carbonyl oxide to interacting with oxide atoms of water because larger electrostatic force. Interestingly, the proton of N-H group in NMA molecule becomes more positive than proton of water molecule in water environment whereas it is vice versa in vacuum environment. However, whether specific anion is hydrated or stays naked (in other words, goes to N-H group) largely depends on its own hydrophilicity (as a part of our goal in this study, we are trying to, to some extent, quantitatively define this abstract concept by the combination of EPS and HB terminus). Thus, under the same conditions (same NMA and same aqueous environment), there is no bias in depicting the hydrophilicity of anions by using EPS and changes in chemical shifts.

In vacuum environment:

In water environment:

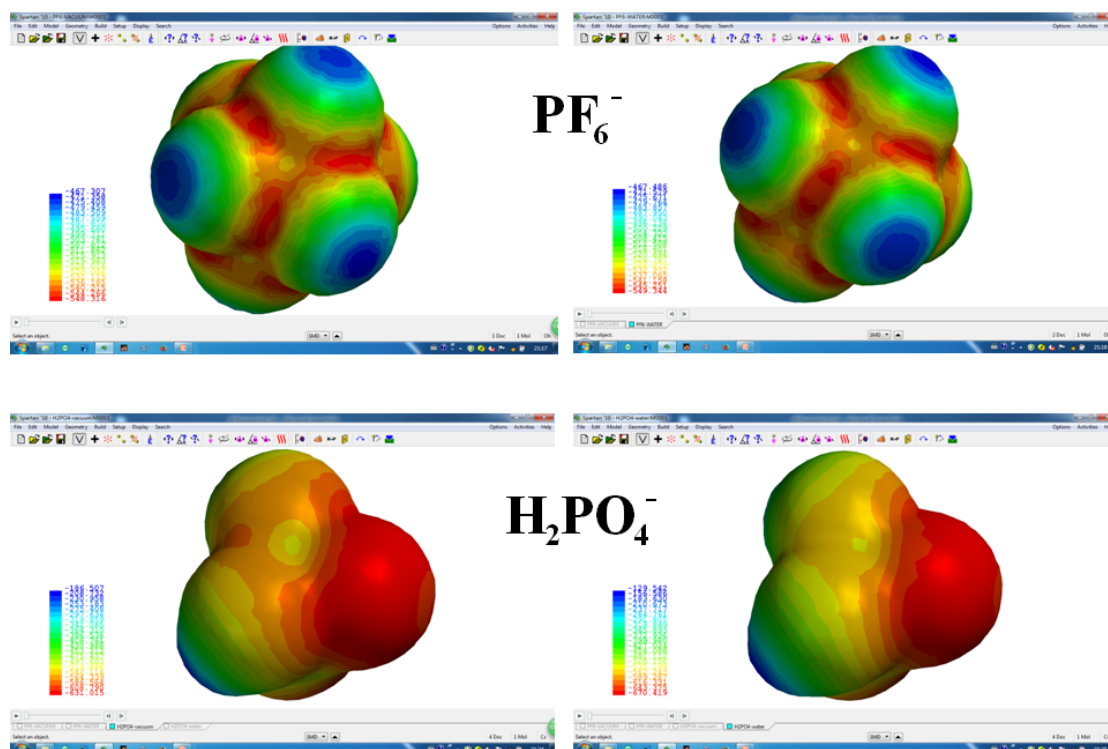

**Fig. S41** Hydration effects on electrostatic potential surfaces of different anions.

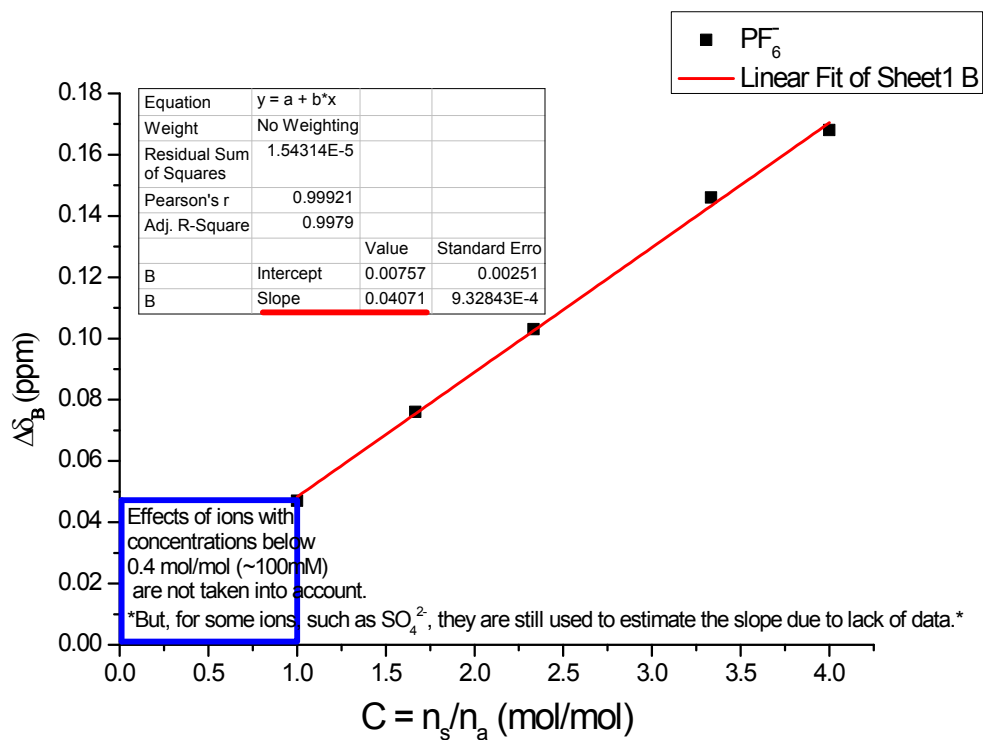

**Fig. S42** An example of deriving the slope<sub>B</sub> that is the rate of changing chemical shifts under effects of ions, from Fig. 2&4.

|         | Slope <sub>B</sub> (ppm/1) |
|---------|----------------------------|
| PF6-    | 0.0407                     |
| I-      | 0.0403                     |
| ClO4-   | 0.0383                     |
| DCA-    | 0.0339                     |
| SCN-    | 0.0340                     |
| Br-     | 0.0302                     |
| ClO3-   | 0.0283                     |
| S2O32-  | 0.0253                     |
| BF4-    | 0.0251                     |
| NO3-    | 0.0288                     |
| Cl-     | 0.0218                     |
| SO42-   | 0.0270                     |
| NO2-    | 0.0158                     |
| HCOO-   | 0.0053                     |
| HCO3-   | -0.0023                    |
| CH3COO- | -0.0016                    |
| HPO42-  | -0.0210                    |
| F-      | -0.0034                    |
| CO32-   | -0.0169                    |
| H2PO4-  | -0.0209                    |
| OH-     | -0.0193                    |
| K+      | 0.0232                     |
| Na+     | 0.0218                     |
| Gdm+    | 0.0123                     |
| NH4+    | 0.0116                     |
| Ca2+    | 0.0104                     |
| Li+     | 0.0086                     |

**Table S2.** The values of slope<sub>B</sub> derived from Fig. 2&4.
